# Supplementary material for: Spodumene reference materials for LA-MC-ICP-MS Li isotopic analysis
Source: Royal Society of Chemistry journal article supplement (doi:10.1039/d5ja00359h), 2025-12-31
Supplement: d5ja00359h2.xlsx [file d5ja00359h2.xlsx]

## Sheet: Table S1
Table S1 EPMA results of the spodumene reference materials
Sample	80017-01	80017-02	80017-03	80017-04	80017-05	80017-06	80017-07	80017-08	80017-09	80017-10	80017-11	80017-12	80017-13	80017-14	80017-15	80017-16	80017-17	80017-18	80017-19	80017-20	SPD-1-01	SPD-1-02	SPD-1-03	SPD-1-04	SPD-1-05	SPD-1-06	SPD-1-07	SPD-1-08	SPD-1-09	SPD-1-10	SPD-1-11	SPD-1-12	SPD-1-13	SPD-1-14	SPD-1-15	SPD-1-16	SPD-1-17	SPD-1-18	SPD-1-19	SPD-1-20	SPD-1-21	SPD-1-22	SPD-1-23	SPD-1-24	SPD-1-25	SPD-1-26	SPD-1-27	SPD-1-28	SPD-1-29
SiO2	64.575	64.51	64.971	64.845	64.901	65.047	64.232	64.524	64.683	64.591	64.508	64.512	64.281	64.236	64.734	64.771	64.874	64.175	64.684	64.39	64.884	64.476	64.522	64.279	64.874	64.469	64.84	64.382	64.808	64.051	64.745	64.777	64.77	64.9	64.81	64.633	64.3	64.724	64.65	64.463	63.802	64.216	64.315	64.585	64.085	64.082	64.219	64.485	64.663
TiO2	0.067	0	0.089	0.022	0	0	0.007	0.007	0	0	0.02	0.007	0.002	0	0.024	0	0	0	0	0.013	0	0.03	0.035	0.006	0	0	0.031	0	0.022	0	0	0	0	0	0	0	0	0	0	0.018	0	0.015	0	0.024	0	0	0	0.035	0.022
Al2O3	27.515	27.523	27.813	27.436	27.735	27.756	27.926	27.598	27.517	27.483	27.783	27.434	27.712	27.847	27.881	27.563	27.677	27.411	27.446	27.539	27.349	27.63	27.708	27.236	27.605	27.401	27.512	27.637	27.779	27.423	27.617	27.529	27.427	27.839	27.538	27.587	28.011	27.59	27.767	27.311	27.323	27.36	27.766	27.503	27.503	27.315	27.347	27.67	27.595
FeO	0.007	0	0.035	0.046	0	0	0.007	0	0	0.002	0.026	0.019	0.025	0	0	0	0	0.042	0	0.009	0.06	0.077	0.092	0.088	0.094	0.06	0.089	0.138	0.065	0.091	0.059	0.095	0.08	0.062	0.077	0.043	0.08	0.086	0.056	0.059	0.098	0.077	0.101	0.09	0.126	0.045	0.083	0.054	0.061
MnO	0.004	0.032	0	0	0	0	0	0.046	0.022	0	0	0	0	0.019	0	0	0	0.009	0.02	0	0.034	0.095	0.065	0.081	0.05	0.034	0.069	0.052	0.098	0.061	0.063	0.024	0.05	0.076	0.053	0.065	0.072	0.06	0.086	0.064	0.048	0.035	0.063	0.074	0.029	0.039	0.038	0.083	0.068
CaO	0	0	0.031	0	0.016	0.016	0.018	0	0	0.054	0	0.005	0.028	0	0.008	0.015	0.01	0.007	0	0	0	0	0	0	0	0	0	0	0	0	0	0	0	0	0	0.014	0	0.014	0.006	0.012	0.012	0.021	0.003	0.016	0	0.009	0	0	0
Na2O	0.122	0.154	0.135	0.124	0.097	0.075	0.084	0.097	0.133	0.144	0.097	0.165	0.111	0.116	0.122	0.123	0.127	0.109	0.092	0.094	0.216	0.216	0.205	0.239	0.255	0.205	0.206	0.223	0.211	0.215	0.205	0.143	0.137	0.134	0.136	0.202	0.135	0.148	0.182	0.154	0.139	0.151	0.165	0.127	0.127	0.152	0.218	0.182	0.152
K2O	0.016	0	0	0	0.022	0.005	0.012	0.014	0.012	0.005	0	0.019	0	0.012	0.015	0	0	0.002	0.014	0.012	0.049	0.056	0.024	0.026	0.033	0.045	0.041	0.057	0.056	0.03	0	0.011	0	0.012	0.012	0.01	0.007	0	0	0.012	0.016	0.012	0.003	0.005	0.006	0	0.005	0.008	0.014
NiO	0.004	0.05	0.049	0.029	0.026	0.011	0.026	0.073	0	0.093	0	0	0.033	0.004	0	0	0.038	0.005	0	0.016	0	0	0.033	0	0.014	0	0.023	0	0	0.017	0	0.03	0	0	0.015	0	0	0	0.029	0	0	0	0	0	0.016	0	0	0	0
Li2Oa	8.02755	8.01947	8.07677	8.06111	8.06807	8.08622	7.98491	8.02121	8.04097	8.02954	8.01922	8.01971	7.991	7.9854	8.04731	8.05191	8.06472	7.97782	8.0411	8.00455	8.01479	8.09714	8.12	7.98168	8.08981	8.03003	8.06256	8.09919	8.14081	8.03648	8.09333	8.06754	8.03765	8.15839	8.07018	8.08454	8.20879	8.08542	8.13729	8.00366	8.00717	8.01801	8.137	8.05992	8.05992	8.00483	8.01421	8.10886	8.08688
Total	100.338	100.288	101.2	100.563	100.865	100.996	100.297	100.38	100.408	100.402	100.453	100.181	100.183	100.219	100.831	100.524	100.791	99.7378	100.297	100.078	100.607	100.679	100.804	99.9377	101.015	100.251	100.874	100.588	101.18	99.9245	100.782	100.677	100.502	101.181	100.711	100.639	100.814	100.707	100.916	100.099	99.4452	99.905	100.553	100.484	99.9519	99.6508	99.9242	100.626	100.662
a: Estimated measurements by assuming Li:Al (molar) = 1.
[truncated: 135 more columns]

## Sheet: Table S2
Table S2 LA-ICP-MS results of the spodumene reference materials
Comments	Li	B	Na	Mg	Al	P	K	Ca	Sc	Ti	V	Cr	Mn	Fe	Co	Ni	Cu	Zn	Rb	Sr	Y	Zr	Nb	Mo	Sn	Ba	La	Ce	Pr	Nd	Sm	Eu	Gd	Tb	Dy	Ho	Er	Tm	Yb	Lu	Hf	Ta	W	Pb	Th	U
Mass	7	11	23	24	27	31	39	43	45	47	51	52	55	56	59	60	63	66	85	88	89	90	93	95	118	137	139	140	141	146	147	153	157	159	163	165	166	169	172	175	178	181	182	208	232	238
	µg g⁻¹	µg g⁻¹	µg g⁻¹	µg g⁻¹	µg g⁻¹	µg g⁻¹	µg g⁻¹	µg g⁻¹	µg g⁻¹	µg g⁻¹	µg g⁻¹	µg g⁻¹	µg g⁻¹	µg g⁻¹	µg g⁻¹	µg g⁻¹	µg g⁻¹	µg g⁻¹	µg g⁻¹	µg g⁻¹	µg g⁻¹	µg g⁻¹	µg g⁻¹	µg g⁻¹	µg g⁻¹	µg g⁻¹	µg g⁻¹	µg g⁻¹	µg g⁻¹	µg g⁻¹	µg g⁻¹	µg g⁻¹	µg g⁻¹	µg g⁻¹	µg g⁻¹	µg g⁻¹	µg g⁻¹	µg g⁻¹	µg g⁻¹	µg g⁻¹	µg g⁻¹	µg g⁻¹	µg g⁻¹	µg g⁻¹	µg g⁻¹	µg g⁻¹
BCR-2G 01	9.34	6.4	22840	17900	66820	1497	14930	47100	30	11950	399.8	11.7	1421	91600	37.2	15.9	17.4	150.1	48.8	311.6	30.8	164.4	11.18	247.7	2.23	629	22.89	48.7	5.78	27.2	6.28	1.77	5.99	0.914	5.83	1.072	3.32	0.523	2.8	0.522	4.24	0.71	0.54	10.31	5.33	1.63
BCR-2G 02	8.4	5.9	22930	18020	66720	1514	14950	44100	28.4	11810	398.3	14.6	1406	90400	36.8	11.7	17.2	145.3	46.7	302.6	29.68	157.6	10.66	241.1	2.19	616	22.33	46.9	5.91	24.6	6.1	1.56	5.81	0.955	5.25	1.116	3.2	0.472	2.7	0.477	4.45	0.617	0.47	9.57	5.34	1.66
BCR-2G 03	9.8	5.7	22860	18090	67100	1479	15160	46100	29.8	12210	401.1	13.7	1432	93100	38.1	13.8	17.4	151.6	48.6	314.9	30.73	163.6	11.2	254.9	2.12	642	23.44	48	6.13	26.9	6.38	1.74	5.98	0.888	5.78	1.228	3.4	0.443	3.32	0.512	4.62	0.655	0.53	10.28	5.28	1.66
BCR-2G 04	7.8	5.1	22770	17820	67540	1503	15240	44500	29.9	12020	401.2	13.7	1429	91900	37.7	13.7	17.1	145.5	48.2	307.5	30.63	160.2	11.26	247.8	1.95	610	22.4	47.2	5.72	25.1	5.59	1.78	5.88	0.847	5.66	1.09	3.09	0.413	3.14	0.45	4.56	0.619	0.68	9.79	5.17	1.49
BCR-2G 05	8.26	5.4	22800	17730	66540	1449	15420	45800	29.5	11980	405.4	12.9	1399	90700	37.6	12.8	17.9	146.6	47.7	306.3	29.8	161.1	11.13	248.6	1.93	620	22.7	46.7	5.84	24.5	5.39	1.91	5.47	0.846	6.3	1.19	3.22	0.47	3.22	0.43	4.35	0.65	0.55	10.26	5.47	1.51
BCR-2G 06	9.08	3.9	23290	18070	66690	1479	15490	45000	29.1	11740	396.3	12.6	1388	89100	35.8	11.9	17.3	139.9	48.8	301.8	28.5	155.7	10.25	244	2.16	606	21.99	47.1	5.86	24.5	5.65	1.73	5.73	0.934	5.6	1.16	3.29	0.479	2.84	0.475	4.48	0.698	0.6	10.07	5.4	1.62
BCR-2G 07	8.61	5.1	22980	17890	66350	1489	15040	45100	30.2	11910	401.6	13.4	1417	91000	37.3	11.7	17.3	149.4	48.9	307.2	30.19	158	11.03	249.6	2.08	621	22.13	47.5	6.02	25.4	5.9	1.77	6.15	0.943	5.67	1.101	3.17	0.406	3.09	0.447	4.27	0.63	0.66	9.65	5.24	1.42
BCR-2G 08	9.5	5.1	23070	17790	66600	1452	14800	44700	28.8	11900	401	13.6	1405	91400	37.3	10.9	16.5	143.6	49.1	310.2	30.65	163.2	10.71	253.7	2.12	623	22.52	48.3	6.13	25.7	6.01	1.76	6.13	0.956	5.58	1.138	3.16	0.428	3.3	0.535	4.41	0.624	0.45	9.92	5.13	1.5
BCR-2G 09	9	4.9	22960	18010	66930	1479	14990	46100	29.8	11870	396.2	14.2	1402	91300	37	12.9	16.3	141.9	48.1	304.3	29.5	160.3	11.03	250.1	2.23	618	22.14	46.6	6	24.8	6.06	1.75	6.34	0.895	5.28	1.16	3.21	0.504	3.08	0.496	4.44	0.72	0.51	9.8	5.31	1.62
BCR-2G 10	9.2	5.6	22870	17800	66590	1502	15260	46600	28.7	11980	396.8	12.9	1412	90600	37.9	11.8	17	141	46.8	304.4	30.42	159.3	10.53	245.6	2.21	616	22.08	47	5.8	25.4	5.65	1.78	5.72	0.876	5.49	1.183	3.48	0.534	2.89	0.445	4.36	0.593	0.41	9.59	5.3	1.64
BCR-2G 11	9.42	5.8	22870	17870	66430	1523	15210	45100	30.3	11940	401.3	12.3	1409	90900	36.1	13.1	16.7	141.6	47.9	303.7	29.83	159.3	11.38	246	2.12	598	21.59	47.9	5.85	24.7	6.47	1.65	6.36	0.887	5.65	1.103	3.53	0.46	3.09	0.456	4.54	0.667	0.42	9.74	5.24	1.58
BCR-2G 12	8.38	5.6	23010	17980	67030	1474	15210	45200	28.9	11970	392.2	16.3	1407	90200	36.1	11.5	16.7	136.9	47.9	299.2	29.68	158.1	10.44	244.8	1.64	586	22.07	46.2	5.81	24.3	5.93	1.79	5.57	0.824	5.56	1.141	3.17	0.408	2.85	0.472	4.54	0.616	0.53	10.24	5.2	1.59
BCR-2G 13	8.41	4.6	22750	18010	67290	1431	15250	46600	30	11970	403.3	12.9	1449	92000	38.1	13.5	18.1	148.4	48.5	314	29.99	162.5	11.28	253.2	1.84	635	23	48.6	6.05	25.6	6.24	1.75	6.71	1.01	6.01	1.143	3.27	0.47	2.89	0.409	4.64	0.588	0.54	9.85	5.45	1.57
BCR-2G 14	9	4.3	22680	17980	67330	1400	15060	45300	29.3	11970	404.1	15.2	1437	92900	36.5	12.4	16.8	145.5	47.6	312.2	30.7	160.8	11.09	252.8	1.98	632	22.34	46.9	6.09	25	5.54	1.83	6.08	0.849	5.66	1.107	3.26	0.479	3.41	0.477	4.71	0.677	0.49	9.65	5.33	1.58
BCR-2G 15	8.2	6.3	22750	17830	67100	1387	15110	46900	29	12080	399.8	14.6	1426	90400	37.3	11.7	16.6	145.1	47.4	300.9	29.87	157.2	10.57	240.1	1.9	607	21.97	46.6	5.86	25.5	5.72	1.64	5.79	0.99	5.1	1.194	3.13	0.455	2.87	0.483	4.31	0.652	0.56	9.54	5.33	1.65
BCR-2G 16	9.06	5.2	22990	18260	67870	1423	15220	46600	29	12190	402.2	17.2	1437	91200	36.1	11.3	17.3	143.5	47.2	311.5	30.8	159.9	11.14	250.7	2.12	634	22.46	48.9	5.9	25.2	6.03	1.97	6.35	0.919	5.55	1.174	3.28	0.542	3.11	0.432	4.28	0.576	0.69	9.8	5.16	1.73
BCR-2G 17	8.49	4.8	22690	18100	67280	1482	15240	46400	29.6	12170	397.5	15.4	1423	90400	37.7	11.3	16.9	148.7	47.9	311	30.21	161.5	11.37	248.7	2.03	631	22.45	49.1	5.86	26.3	6.02	1.67	6.2	0.905	5.93	1.128	3.74	0.457	3.26	0.434	4.4	0.639	0.56	9.69	5.08	1.58
BCR-2G 18	9.39	5.4	23100	18020	67470	1478	15270	46500	30.7	12070	409.1	14.4	1438	93100	36.5	14.3	17.5	144	48.4	313.1	30.1	159.8	11.08	255.6	1.89	647	22.91	49.1	6.6	25.9	6.12	1.76	6.31	0.897	5.62	1.2	3.37	0.462	2.89	0.497	4.52	0.72	0.57	9.84	5.3	1.43
BCR-2G 19	9.02	5.4	22770	17840	68000	1513	15170	46700	29.5	12050	401	14	1416	92400	36.5	15.8	17.7	140.6	47.6	308.2	30	159.5	11.17	248.2	2.22	630	22.45	47.5	6.25	24.9	5.99	1.83	5.43	0.93	5.86	1.21	3.21	0.486	2.91	0.429	4.41	0.694	0.53	9.81	5.4	1.7
BCR-2G 20	10.27	5.8	22990	18330	67260	1560	15170	46300	29.3	12240	399.7	14.2	1424	91600	38.4	14	16.2	143.8	48.1	313.8	30.1	159.4	10.55	248.2	2.16	625	22.75	48.3	5.99	24.9	6.45	1.72	5.97	0.914	5.3	1.07	3.29	0.501	2.92	0.469	4.28	0.694	0.6	9.66	5.28	1.55
BCR-2G 21	8.97	5.3	22660	17900	67260	1520	15010	45700	29.6	12260	397.3	14.1	1414	89600	36.7	12.5	17.3	140.7	47.3	304.7	29.6	152.9	10.9	246.5	1.83	612	22.05	46.4	5.71	23.9	5.74	1.67	5.33	0.899	5.45	1.09	3.32	0.414	3.27	0.448	4.76	0.587	0.55	10.04	5.36	1.6
BCR-2G 22	8.7	5.4	22940	18050	66970	1485	15260	46100	29.1	12210	395.3	13.4	1405	91100	36.8	12.6	16.2	143.8	47	307.1	29.43	156.3	10.59	250.4	2.11	625	22.69	47.2	5.78	25.2	5.93	1.8	5.51	0.913	5.44	1.132	3.36	0.399	3.07	0.485	4.29	0.663	0.44	10.11	5.37	1.61
BCR-2G 23	8.9	5.5	22780	18100	67730	1461	15000	45700	29.9	12300	397	14.4	1424	91400	38	15.2	17.3	139.5	47.7	308.5	30	155.5	10.98	249.2	1.86	613	22.15	47.1	5.8	24.4	5.29	1.61	5.71	0.994	5.27	1.19	3.22	0.428	2.75	0.442	4.1	0.625	0.54	9.61	5.22	1.6
BCR-2G 24	9.29	5.2	22780	17780	66900	1438	14940	44700	29.2	11830	400.1	14.8	1418	91600	37	10.3	17.6	141.6	48	308.8	30.1	158.9	10.78	248	2.09	619	22.21	46.9	5.97	24.4	6	1.64	5.84	0.93	5.76	1.167	3.28	0.401	3.01	0.395	4.34	0.664	0.52	9.44	5.13	1.54
Average	8.93708	5.32083	22880.4	17965.4	67075	1475.75	15141.7	45787.5	29.4833	12025.8	399.9	14.0208	1418.25	91245.8	37.1042	12.775	17.0958	144.108	47.925	307.812	30.0546	159.375	10.9292	248.562	2.04208	620.625	22.4046	47.5292	5.94625	25.1792	5.93667	1.745	5.93167	0.913125	5.60833	1.14529	3.29042	0.45975	3.02833	0.463208	4.42917	0.649083	0.539167	9.84417	5.28417	1.58583
BHVO-2G 01	4.19	3	16200	35920	64590	1072	4297	71700	26.6	13720	286.4	254	1179	80300	42.7	122.4	123.7	106.7	8.72	347.3	20.49	138.5	14.81	3.91	1.63	117.4	12.98	32.48	4.66	20.1	5.56	1.8	5.39	0.823	4.24	0.89	2.3	0.282	1.61	0.21	3.58	0.968	0.24	1.57	1.12	0.394
BHVO-2G 02	3.95	2.7	16200	36460	65030	1088	4321	71800	27.4	13780	288.9	254.4	1184	80400	43.4	124.6	126.3	109.6	9.78	350.8	20.72	139.1	14.5	3.49	1.68	116	13.46	32.4	4.84	21.1	5.32	2.02	5.09	0.768	4.37	0.884	2.3	0.333	1.86	0.246	4.1	0.885	0.27	1.85	1.12	0.458
BHVO-2G 03	4.25	2.61	16460	36220	65720	1083	4408	71500	27.4	13770	291.7	257.7	1194	81300	42.8	120	127.8	111.6	9.18	358.3	21.45	141.8	15.27	3.86	1.21	116.2	13.37	33.2	4.71	22.2	5.03	1.87	5.66	0.814	4.54	0.809	2.21	0.284	1.67	0.242	3.77	0.939	0.3	1.63	1.17	0.436
BHVO-2G 04	2.81	2.8	16190	36000	65900	1112	4441	72200	27.9	13840	289.7	258.7	1189	80900	43.6	120.1	122.9	110	8.98	350.4	21.06	142.3	14.91	4	1.55	118.2	13.44	32.9	4.71	21.3	5.18	1.76	5.12	0.779	4.53	0.87	2.17	0.296	1.66	0.257	3.79	0.939	0.22	1.69	1.19	0.443
BHVO-2G 05	4.12	3.1	16140	35570	64940	1118	4484	71700	26.7	13700	289.7	248.7	1181	79600	43.3	120.4	126.3	106.6	9.61	343.8	21.08	139.9	15.06	4.5	1.66	115.5	12.89	32.3	4.56	20.7	5.3	1.75	4.98	0.801	5.06	0.773	2.22	0.29	1.77	0.256	3.94	0.915	0.251	1.59	0.96	0.369
BHVO-2G 06	4.38	2.17	16210	36140	64990	1139	4467	72800	27.5	13870	298	256.5	1191	81800	43.9	122.6	128.3	111.3	10.18	347.9	21.58	140.6	14.73	4.58	1.39	118.7	13.16	33.3	4.47	22.2	5.6	1.92	5.05	0.825	4.53	0.834	2.21	0.308	1.65	0.218	3.84	0.982	0.18	1.66	1.031	0.373
BHVO-2G 07	4.71	2.85	16130	36010	65050	1081	4296	70800	27.37	13770	290.5	249.7	1180	80300	44	124	120.9	107.3	9.19	347.3	20.75	139.8	14.93	4.03	1.76	120.5	13.36	32.56	4.42	21.3	5.91	1.77	5.04	0.79	4.88	0.848	2.33	0.276	1.83	0.246	3.63	0.919	0.34	1.68	0.92	0.388
BHVO-2G 08	4.6	3.09	16160	36090	65300	1107	4234	70500	26.3	13870	290.9	251	1191	80900	43.9	120.9	125.8	108.6	9.25	343.3	21.08	139.6	14.84	3.3	1.52	115.3	12.9	32.45	4.52	19.7	4.91	1.73	5.45	0.77	4.54	0.803	2.24	0.259	1.73	0.246	3.93	0.897	0.224	1.59	1.12	0.429
BHVO-2G 09	4.66	2.96	16200	36410	64760	1076	4342	73400	27.6	13920	290.8	256	1189	81100	45.1	125.2	124.3	105.8	9.21	346.7	21.25	140.6	14.74	3.73	1.56	115.5	13.51	31.7	4.43	21.2	5.4	1.66	4.94	0.867	4.4	0.796	2.13	0.254	1.64	0.259	3.93	0.975	0.296	1.62	1.07	0.389
BHVO-2G 10	5.17	3.4	16240	35970	64900	1082	4378	72000	27.1	13880	291.5	257.7	1181	80300	43.5	123.4	125.8	109.9	9.73	352	21.42	138.3	14.61	3.98	1.52	117.1	13.07	32.5	4.63	21.1	5.68	1.78	5.43	0.831	4.77	0.859	2.23	0.319	1.67	0.239	3.9	0.886	0.27	1.6	1.1	0.443
BHVO-2G 11	4.23	3.7	16200	35930	65180	1090	4442	72500	26.3	13990	297.2	256.5	1186	80500	44.7	121.3	127.7	108.9	9.62	346.1	20.84	139.9	15.04	3.64	1.73	116.5	13.31	32.6	4.43	21	4.97	1.76	5.45	0.752	4.11	0.87	2.3	0.272	1.71	0.249	3.64	0.874	0.31	1.7	1.06	0.391
BHVO-2G 12	4.54	2.85	16040	35690	65080	1092	4389	71700	26.6	13910	288.4	257.1	1180	80700	42.5	120.6	123	105.9	9.05	345.4	21.01	138.6	14.85	4.18	1.79	114.3	13.15	33	4.35	20.9	4.95	1.78	5.21	0.773	4.58	0.828	2.28	0.291	1.55	0.225	4.1	0.959	0.278	1.6	1.05	0.335
BHVO-2G 13	4.48	3.14	16000	35910	65230	1067	4373	72300	27.6	13790	295.2	261.9	1198	81000	44.6	122.2	126.4	114.9	9.6	361.8	21.23	140.2	15.53	3.76	1.64	120.4	13.71	32.8	4.7	21.1	5.26	1.94	5.73	0.754	4.28	0.822	2.1	0.281	1.78	0.226	3.69	0.903	0.216	1.47	0.99	0.348
BHVO-2G 14	3.96	2.5	16030	35500	65330	1039	4350	72400	27.1	13760	291	255.7	1196	80400	43.1	121.4	123.3	107	9.02	349.9	20.47	139.2	15.14	4.15	1.43	116.9	13.39	32.7	4.75	20.5	5.55	1.63	5.46	0.816	4.8	0.772	2.31	0.312	1.8	0.241	3.54	0.965	0.28	1.66	1.033	0.342
BHVO-2G 15	3.07	2.8	16100	36540	65900	1063	4340	72700	26.1	14080	293.8	261.4	1209	80900	44	119	128	108.2	8.97	354.6	21.53	140.1	14.5	3.62	1.73	119.7	12.83	32.8	4.78	21.2	5.02	1.89	5.68	0.756	4.56	0.896	2.19	0.293	1.86	0.261	3.82	0.908	0.234	1.76	1.07	0.366
BHVO-2G 16	3.57	3.62	16120	36830	66100	1071	4346	73300	27.5	14140	296.9	264.7	1215	81800	45.6	123.6	125.5	108.4	10.08	356.1	21.13	141	15.6	3.5	1.58	122.8	13.28	34.2	4.86	22.2	5.76	1.74	5.62	0.726	4.62	0.865	2.27	0.282	1.7	0.239	3.81	0.949	0.3	1.53	1.066	0.426
BHVO-2G 17	4.45	3.7	16120	36770	65900	1096	4378	73200	27.9	14100	291.5	260.2	1194	81000	44.2	122.2	125.7	107.2	9.32	355.6	20.87	140.8	16.05	4.07	1.95	119.6	13.22	33.1	4.45	21.4	5.14	1.85	5.48	0.835	4.35	0.856	2.11	0.321	1.97	0.227	4.3	0.935	0.25	1.54	1.047	0.427
BHVO-2G 18	4.05	2.95	16020	36130	65600	1117	4365	72900	27.41	13920	291.6	260.4	1208	81200	44.4	126.2	123.8	112.3	9.4	344.9	20.81	136.5	14.93	3.43	1.46	114.9	13.06	32.5	4.42	20.7	5.12	1.64	5.53	0.782	4.51	0.77	2.19	0.232	1.65	0.216	3.69	0.858	0.243	1.56	1.012	0.394
BHVO-2G 19	4.43	2.39	16130	36130	66400	1109	4441	72500	27.4	14030	293.3	260.7	1214	81100	43.8	122.5	126	110.5	8.97	351.6	21.26	138.6	15.1	3.79	1.63	119.5	13.52	32.09	4.71	21.4	5.35	1.7	5.15	0.761	4.78	0.811	2.07	0.292	1.75	0.26	3.82	0.978	0.189	1.61	1.048	0.415
BHVO-2G 20	4.45	3.03	15860	35570	65400	1128	4317	71600	27	14110	291.3	258.2	1192	80700	44.4	123.8	127.1	100.8	9.37	353	21.27	138.9	14.91	3.72	1.32	121.3	12.78	32.5	4.44	19.7	5.01	1.88	5.25	0.706	4.3	0.764	2.21	0.3	1.77	0.236	3.61	0.933	0.193	1.62	1.02	0.314
BHVO-2G 21	3.82	3.08	16100	36610	65820	1118	4406	73200	26.9	14670	296.6	260	1203	81600	45	126.4	128.4	105.7	9.74	356.9	21.56	143.3	15.3	3.93	1.46	121.8	13.52	34.1	4.77	22.1	5.12	1.79	5.67	0.772	4.36	0.824	2.1	0.27	1.65	0.223	3.48	0.944	0.21	1.56	1.1	0.356
BHVO-2G 22	3.96	2.92	15970	36080	64700	1087	4349	71800	26.4	14240	288.8	258.2	1201	80900	45.3	122.9	123.3	116.6	9.08	354	21.29	140.4	15.72	3.92	1.6	119.2	13.41	32.6	4.49	20.8	5.01	1.76	5.11	0.795	4.51	0.817	2.21	0.298	1.63	0.257	3.74	0.912	0.22	1.58	1.02	0.31
BHVO-2G 23	4.29	3.34	16260	36660	65730	1098	4414	72200	26.7	14080	290.6	260	1197	80300	43.2	125.8	126.1	106.7	9.53	351.5	20.47	140.6	14.88	3.24	1.51	117.4	13.23	32.9	4.49	20.7	5.02	1.66	5.27	0.752	4.46	0.869	2.33	0.282	1.69	0.248	3.93	0.954	0.3	1.7	1.05	0.376
BHVO-2G 24	3.6	3.15	16210	36080	65610	1111	4360	73800	26.84	14010	292.9	261.9	1201	80500	44.5	124.4	124.3	106.3	9.39	350	20.89	139.2	15.32	3.87	1.54	118.9	13.06	33	4.6	20.83	5.07	1.8	5.54	0.779	4.49	0.877	2.19	0.309	1.68	0.226	3.7	0.928	0.28	1.57	1.078	0.449
Average	4.15583	2.99375	16137.1	36134.2	65381.7	1093.5	4372.42	72270.8	27.0675	13956.2	291.967	257.554	1193.88	80812.5	43.9792	122.746	125.446	108.617	9.37375	350.8	21.0629	139.908	15.0529	3.84167	1.57708	118.067	13.2338	32.7783	4.59125	21.0596	5.26	1.78667	5.34583	0.784458	4.52375	0.833625	2.21667	0.289	1.72	0.239708	3.80333	0.929375	0.253917	1.6225	1.06021	0.390458
SPD-1 01	36624.5	0	1083.94	0	142905	0	0	0	0	39.2513	1.84179	0	442.332	754.833	0	0	0	4.74035	0	0.0332127	0	0	0	0	38.6475	0.422707	0.36232	0.0217392	0.00422707	0.301933	0.153986	0	0	0	0.0785027	0	0	0	0	0	0	0	0	0	0	0
SPD-1 02	36594.3	0	1073.07	0	141577	0	0	0	1.50967	49.5171	2.2645	0	371.378	602.961	0	0	0	3.6232	0	0	0.0694447	0	0	0	73.9737	0	0.0573673	0	0.0265701	0.250605	0.214373	0.0323069	0	0	0.0392513	0	0	0.0193237	0	0	0.102657	0	0	0	0	0
SPD-1 03	36503.7	0	1112.32	0	144686	0	0	0	0	42.5726	2.74759	0	371.076	602.659	0	0	0	0	0	0	0	0	0	0.081522	42.2707	0	0.108696	0	0.0664253	0	0	0	0	0.0217392	0	0	0.0483093	0	0	0	0	0	0	0	0	0.0120773
SPD-1 04	36775.5	0	1039.56	1.41909	143026	0	0	0	0	36.5339	2.32489	0	406.704	554.651	0	0	0	3.56281	0	0	0	0	0	0	114.735	0	0	0	0	0	0.09058	0	0	0.00573673	0	0.0603867	0	0	0	0	0.175121	0.0111715	0	0	0	0
SPD-1 05	36443.3	2.7174	1061.9	0	141577	0	0	0	0	37.4397	2.32489	0	459.542	558.577	0	0	0	4.28745	0	0	0	0	0.114735	0.603867	42.2103	1.26812	0	0	0	0	0	0	0	0.0392513	0	0	0	0	0	0	0	0	0	0	0.18116	0
SPD-1 06	36141.4	0	1061.9	0	141486	0	0	0	0	38.6475	1.90218	0	457.731	561.596	0	0	0	4.83093	0	0	0	0	0	0.0785027	40.4893	0	0	0	0.0157005	0	0	0.0422707	0.301933	0	0	0	0	0	0	0	0	0	0	0	0	0
SPD-1 07	36322.6	3.10991	1060.99	0	142694	0	0	0	0.754833	42.7297	2.56643	0	365.037	616.246	0	0	0	4.67997	0	0.0184179	0.0132851	0.392513	0.0081522	0	51.691	0	0	0.04529	0	0.108696	0.063406	0.0301933	0.286837	0	0	0	0.0694447	0	0	0	0	0.013587	0	0.0935993	0	0.0392513
SPD-1 08	37077.4	2.2645	1073.37	0	142543	0	0	0	0.63406	52.8383	2.23431	0	362.32	625.908	0	0	0	4.55919	0	0.04529	0	0.241547	0	0	59.4809	0.268721	0	0.0202295	0.018116	0	0	0	0	0	0.0117754	0.0217392	0	0	0	0	0	0.0259663	0	0	0	1.14735
SPD-1 09	36986.8	0	1070.35	0	142513	0	0	0	0	32.0049	1.78141	0	470.412	569.748	0	0	0	4.22707	0	0	0	0	0	0	37.8926	0	0	0	0	0	0	0	0.123793	0	0.0332127	0	0	0	0	0.0244566	0.123793	0.0277779	0	0	0.0443842	0.0664253
SPD-1 10	37168	3.56281	982.491	1.96257	142935	0	0	0	0.603867	42.2707	3.07972	0	317.03	616.246	0	0	0	4.01571	0	0	0	0	0	0.099638	51.9929	0.238527	0.0138889	0	0	0.04529	0	0	0	0	0	0	0	0	0	0	0	0.0489132	0	0	0	0
SPD-1 11	36775.5	0	1075.18	2.29469	142784	0	0	0	0	38.3455	2.2645	0	469.506	567.031	0.150967	0	0	5.8877	0	0	0	0	0	0	35.6583	0	0	0	0	0	0	0	0.175121	0	0	0	0	0	0	0	0	0	0	0	0	0
SPD-1 12	36503.7	0	1066.13	0	142935	0	0	0	0.522345	37.4397	1.93237	0	456.523	558.879	0	0	0	4.71016	0	0	0.0694447	0	0	0	37.2888	0.141909	0	0	0	0	0.4529	0	0	0.0301933	0	0.027174	0.081522	0	0.153986	0	0.072464	0.229469	0	0	0	0
SPD-1 13	36805.7	0	1065.52	0	142663	0	0	0	0	30.7972	1.78141	0	465.883	570.956	0.217392	0	0	5.73673	0	0	0	0	0	0	39.0702	0.603867	0.0217392	0	0	0	0	0	0.081522	0.00664253	0	0	0	0	0	0.0117754	0.0513287	0.0664253	0	0.0150967	0.0241547	0
SPD-1 14	36594.3	9.35993	1035.93	0	143086	0	0	0	0	38.0436	1.93237	0	479.168	569.446	0	0	0	4.16668	0	0	0	0	0.160025	0	39.4929	0.132851	0	0	0	0	0.153986	0	0	0	0	0	0	0	0.392513	0	0	0.688408	0	0	0	0
SPD-1 15	36473.5	0	1052.84	0	142513	0	0	0	0.81522	30.7972	1.8116	0	470.412	543.178	0	0	0	5.31403	0	0	0.0235508	0	0.0235508	0	35.447	0	0	0	0	0.332127	0	0.054348	0	0	0	0.0117754	0	0	0	0.00301933	0	0.0422707	0.0301933	0	0	0
SPD-1 16	36896.2	2.7174	1075.18	0	142845	0	0	0	0	33.8165	1.87199	0	472.224	557.369	0	0	0	4.9819	0	0.04529	0	0.157005	0	0.513287	34.0279	0	0.0483093	0	0.141909	0	0	0.0220411	0	0.0332127	0	0	0	0.00483093	0.054348	0	0	0	0	0	0	0.0235508
SPD-1 17	36745.3	2.62682	1033.22	0	142875	0	0	0	0.603867	33.8165	1.87199	0	454.108	561.898	0	0	0	5.13287	0	0	0	0.0150967	0	0.27174	35.8395	0	0	0.0422707	0.0144928	0	0.129831	0	0.0422707	0	0	0.036232	0.0253624	0	0	0	0.081522	0.0754833	0.301933	0.0392513	0	0.0347223
SPD-1 18	36775.5	3.35146	1064.62	0	143116	0	0	0	0	33.5146	1.50967	0	479.772	560.086	0	0	0	6.15944	0	0.0694447	0	0.0694447	0	0.160025	39.4627	0	0	0.0268721	0	0.332127	0	0	0	0	0	0	0.0160025	0	0.138889	0.00754833	0.099638	0	0	0	0	0
SPD-1 19	36292.4	2.62682	1004.23	1.69083	141848	0	0	0	0	40.4591	2.02295	0	471.62	580.014	0	0	0	3.92513	0	0	0.0573673	0	0	0	34.1788	0	0	0	0	0	0	0	0.169083	0.00513287	0.120773	0	0.0694447	0.0141909	0	0	0	0.350243	0	0	0.0150967	0.036232
SPD-1 20	36473.5	0	1095.72	0	142663	0	0	0	0	37.4397	1.87199	0	445.654	573.371	0	0	0	4.10629	0	0	0	0	0	0.301933	34.3298	0	0	0.0513287	0	0.172102	0	0	0	0	0	0	0	0	0	0	0	0	0	0	0	0
SPD-1 21	36533.9	2.98914	1064.01	0	142301	0	0	0	0	34.7223	1.78141	0	464.071	561.898	0	0	0	6.12925	0	0	0	0	0	0	41.0025	0	0	0	0	0	0	0	0	0.0875607	0	0	0	0	0	0.0132851	0.117754	1.42211	0	0	0.027174	0
SPD-1 22	36201.8	2.68721	1068.54	0	141546	0	0	0	0	39.2513	1.75121	0	459.542	555.859	0	0	0	3.74397	0	0	0.0875607	0	0	0.513287	37.8926	0	0	0	0	0.0392513	0	0	0	0	0.108696	0.0117754	0.09058	0.00483093	0	0.00513287	0	0.0392513	0.141909	0.120773	0.027174	0
SPD-1 23	37228.4	3.86475	1106.28	0	142362	0	0	0	0.81522	43.4422	2.41547	0	326.39	649.157	0	0	0	4.9819	0	0.063406	0	0	0	0	47.1922	0.0935993	0	0	0	0	0	0.0392513	0.603867	0.0603867	0	0.0277779	0.211353	0	0.141909	0	0	0	0	0	0	0
SPD-1 24	36805.7	4.37803	1094.21	0	141154	0	0	0	1.05677	40.0847	2.77779	0	325.484	641.306	0.283817	0	0	4.55919	0	0	0.0153986	0.274759	0	0	48.1282	0	0	0	0.0241547	0	0	0.108696	0.132851	0.054348	0	0	0	0	0	0.0392513	0	0	0.0603867	0.0875607	0	0
SPD-1 25	36624.5	3.04953	1101.75	0	142392	0	0	0	0.625002	39.4809	2.50605	0	334.24	648.855	0	0	0	4.71016	0	0	0	0	0.935993	0	48.8528	0	0	0	0.0422707	0	0	0	0	0	0	0	0	0	0	0	0.0966187	0.0262682	0	0	0	0
SPD-1 26	37077.4	3.65339	1096.02	1.78141	141667	0	0	0	0.966187	43.4422	2.80798	0	335.75	632.852	0	0	0	4.71016	0	0	0	0	0	0	49.3359	0.4529	0.00483093	0.0172102	0.063406	0	0.105677	0	0	0.0178141	0.232489	0	0	0	0	0	0.123793	0	0	0	0	0
SPD-1 27	37077.4	3.68359	1086.36	0	142663	0	0	0	0.848433	40.6886	2.86837	0	336.354	646.741	0.268721	0	0	5.34422	0	0	0.105677	0.298914	0	0	50.906	0	0.111715	0	0	0.301933	0	0	0	0.0332127	0	0	0	0	0	0	0.138889	0	0.0150967	0	0	0
SPD-1 28	36866.1	0	1147.95	0	142422	0	0	0	1.14735	42.8745	2.65701	0	316.426	762.382	0	0	0	4.9819	0	0	0	0	0.102657	0	42.633	0	0	0	0	0	0	0	0	0.0301933	0	0.0422707	0	0	0	0	0	0.0283817	0	0.153986	0	0
SPD-1 29	36835.9	0	1131.04	0	142452	0	0	0	0	35.3262	2.35508	0	339.373	697.768	0	0	0	4.71016	0	0	0	0	0.04529	0	34.2694	0.785027	0.0120773	0	0.0392513	0	0	0.138889	0	0	0	0	0	0	0	0	0	0	0	0	0.0199276	0
SPD-1 30	37651.1	6.73311	1051.33	0	145260	0	0	0	0	40.761	2.05315	0	395.533	586.958	0	0	0	4.10629	0	0	0	0	0	0	94.5051	0	0.0220411	0	0	0	0.250605	0.120773	0	0	0	0	0	0	0	0	0	0	0	0	0.00513287	0
SPD-1 31	37288.8	3.41185	1052.84	0	142573	0	0	0	0.785027	49.5171	2.41547	0	352.054	601.753	0	0	0	3.80436	0	0.141909	0.0163044	0	0	0	68.5389	2.14373	0.04529	0	0	0.120773	0	0	0	0.0232489	0	0	0	0.0111715	0.211353	0	0.0845413	0	0	0.114735	0	0.04529
SPD-1 32	36896.2	0	1094.51	0	142271	0	0	0	0	51.6306	3.26088	0	335.75	637.985	0.175121	0	0.40761	4.64977	0	0.0301933	0	0	0	0	50.0907	0	0	0	0.0220411	0	0	0.178141	0	0	0	0	0	0	0	0	0	0	0	0	0	0.0102657
SPD-1 33	36413.2	0	1084.85	0	142694	0	0	0	0	60.3867	2.80798	0	329.711	641.91	0	0	0	4.46861	0	0.0966187	0	0	0	0	48.0074	0	0	0	0	0	0	0.0332127	0.0664253	0.0160025	0	0	0	0	0.0513287	0	0	0	0	0	0	0
SPD-1 34	36624.5	3.41185	1098.43	0	141426	0	0	0	0.694447	58.2731	2.62682	0	326.39	665.461	0	0	0	4.89132	0	0	0.0157005	0	0	0	50.0002	0	0	0	0	0	0	0	0	0	0.123793	0	0	0	0	0	0	0	0.13587	0	0	0
SPD-1 35	36533.9	0	1087.56	0.99638	141154	0	0	0	0	52.8383	2.80798	0	329.409	634.966	0	0	0	2.92875	0	0.117754	0	0	0	0	49.1245	0.785027	0.0483093	0.081522	0.04529	0	0.072464	0	0	0.036232	0	0	0	0	0	0	0	0.0166063	0	0	0	0
SPD-1 36	36443.3	3.44204	1118.66	0	141335	0	0	0	1.02657	44.9157	2.68721	0	331.825	710.449	0	0	0	4.16668	0	0	0	0	0.111715	0	48.7622	0	0	0	0	0.081522	0	0	0	0.0422707	0	0	0.0229469	0	0	0.0332127	0.0754833	0	0.0392513	0	0	0
SPD-1 37	36835.9	0	1108.4	1.02657	142331	0	0	0	0.875607	41.8963	2.86837	0	327.598	660.328	0	0	0	3.95533	0	0	0.054348	0.214373	0.04529	0	47.8262	0	0	0	0	0.0785027	0	0	0	0.00241547	0	0	0.184179	0.009058	0	0	0	0.0144928	0	0.211353	0	0
SPD-1 38	36352.8	0	1073.67	0	141909	0	0	0	0.99638	41.5582	1.78141	0	364.132	588.77	0.102657	0	0	4.43842	0	0	0	0	0	0.603867	47.4639	0	0.0392513	0	0.0105677	0	0	0	0	0	0	0.0392513	0.160025	0	0	0.0111715	0	0	0	0.04529	0	0
SPD-2 01	36383	17.1498	783.819	0	142724	0	0	0	0	6.61234	0	0	55.8577	0	0	0	0	0	0	0	0	0.247585	0	0	744.266	0.238527	0	0	0	0	0	0	0	0	0.0211353	0	0	0.0265701	0	0.0265701	1.27718	0.326088	0.166063	0	0.0120773	0.04529
SPD-2 02	36413.2	18.901	775.667	0	141788	0	0	0	0	5.64615	0	0	54.348	0	0	0	0.603867	0	0	0.0664253	0.105677	0.332127	0.081522	0	703.203	0	0.00603867	0	0	0	0	0	0	0.0190218	0.099638	0.0603867	0	0	0.178141	0	0.960148	0.265701	0	0	0.0117754	0
SPD-2 03	36533.9	18.116	788.348	0	141939	0	0	0	0	8.1522	0	0	57.6693	0	0	0	0	0	0	0	0	0.31703	0	0	729.471	0.332127	0	0	0	0	0.265701	0.054348	0	0	0	0	0	0.0274759	0	0	1.36474	0	0	0	0	0
SPD-2 04	37168	19.2935	794.387	0	141758	0	0	0	0	4.31765	0	0	57.6693	0	0	0	0	0	0	0	0.0301933	0	0.00664253	0.4529	734.302	0	0	0	0	0	0	0.0392513	0	0	0	0	0	0	0	0	1.32851	0.250605	0	0	0	0.0126812
SPD-2 05	36775.5	17.4819	791.971	0	141818	0	0	0	0	6.67273	0	0	61.2925	0	0	0	0	0	0	0.36232	0	0	0.785027	0	756.041	0.199276	0	0	0.027174	0.0422707	0	0	0	0.036232	0	0	0	0	0	0	1.03865	0.341185	0	0	0	0.13587
SPD-2 06	37349.1	15.7307	800.123	0	143056	0	0	0	0	5	0	0	57.9712	0	0	0	0	0	0	0.111715	0	0.265701	0.0422707	0	759.362	0	0.0241547	0	0.0513287	0	0	0	0	0	0	0.0169083	0	0.0169083	0	0	1.04469	0.301933	0.036232	0	0.00392513	0
SPD-2 07	36745.3	20.3805	804.048	0	141637	0	0	0	0	5.91789	0	0	65.2176	0	0	0	0.63406	0	0	0	0.0603867	0.223431	0.036232	0	788.65	0.187199	0	0.0483093	0	0	0	0.301933	0	0	0	0	0	0.00785027	0	0.0166063	1.05979	0.410629	0.147947	0.036232	0.0117754	0.04529
SPD-2 08	37017	20.924	805.558	0	143811	0	0	0	0	5.97828	0	0	63.1041	0	0	0	0.785027	0	0	0.111715	0	0	0.875607	0.169083	786.536	0	0	0	0	0	0	0	0	0	0	0	0	0	0	0.0111715	1.11111	0.386475	0	0	0	0
SPD-2 09	36775.5	19.1124	803.445	0	142331	0	0	0	0	5.55557	0	0	61.5944	0	0	0	0	0	0	0	0	0	0	0	772.043	0	0	0	0	0.111715	0	0.0244566	0.108696	0.0220411	0	0	0	0	0	0	1.27416	0.295895	0.0664253	0.117754	0	0
SPD-2 10	37017	18.5689	798.916	0	142392	0	0	0	0	8.75607	0	0	60.9905	0	0.0332127	0	0	0	0	0	0.0144928	0.247585	0	0	768.118	0	0.0966187	0.0392513	0.00392513	0	0	0.0392513	0	0.0241547	0	0	0	0	0	0.0268721	1.04167	0.365339	0.153986	0	0	0
SPD-2 11	36896.2	18.3877	790.461	0	142633	0	0	0	0	6	0	0	55.5557	0	0.332127	0	0.446861	0	0	0.0422707	0	0.295895	0	0	766.609	0	0.175121	0	0	0.0211353	0	0	0	0	0.0513287	0	0	0	0.241547	0.00785027	1.30133	0.286837	0	0	0.0323069	0
SPD-2 12	35990.4	17.9952	790.763	0	142633	0	0	0	0	5.85751	0	0	70.6524	0	0	0	0	0	0	0	0	0	0.301933	0.694447	708.034	0	0	0	0.0754833	0	0	0	0	0	0	0	0	0	0.0332127	0.022645	1.02053	0.22645	0	0	0	0
SPD-2 13	36564.1	19.2332	792.273	0	143418	0	0	0	0	5.13287	0	0	68.2369	0	0	0	0	0	0	0.0935993	0	0	0	0	710.449	0	0	0	0	0	0	0.0603867	0.332127	0	0	0	0	0	0	0	0.932974	0.187199	0	0	0	0
SPD-2 14	35748.9	17.4819	766.911	0	140912	0	0	0	0	6.55195	0	0	69.1427	0	0	0	0.483093	0	0	0	0	0	0	0.117754	650.062	0	0	0	0	0	0	0	0.422707	0.0603867	0	0.0301933	0.0301933	0	0.114735	0.0573673	0.932974	0.326088	0	0	0.0603867	0
SPD-2 15	35869.7	19.3237	788.952	0	142029	0	0	0	0	4.04591	0	0	73.3698	0	0	0	0	0	0	0.054348	0.0141909	0	0	0.27174	713.77	0.754833	0	0.036232	0	0.0754833	0	0.0603867	0.422707	0.0184179	0	0	0	0	0	0	0.987322	0.22645	0	0	0	0.0513287
SPD-2 16	36383	18.5387	801.935	0	141758	0	0	0	0	9.058	0	0	66.4253	0	0	0	0	0	0	0.04529	0.027174	0	0	0.332127	701.995	0	0	0.0141909	0	0	0	0.0301933	0	0.00573673	0.241547	0	0	0	0.193237	0	1.16244	0.283817	0	0	0	0
SPD-2 17	36594.3	18.1462	803.143	0	141395	0	0	0	0	4.92151	0	0	68.2369	0	0.027174	0	0	0	0	0.166063	0	0	0.04529	0	695.654	1.05677	0	0	0	0	0	0	0	0	0.0664253	0	0	0	0.036232	0.036232	1.21075	0.320049	0	0	0	0
SPD-2 18	36232	17.331	724.036	0	141275	0	0	0	0	4.5	0	0	76.3891	0	0	0	0	0	0	0	0	0	0.027174	0	558.577	0.190218	0.0150967	0	0.392513	0	0.229469	0	0	0	0.04529	0	0.169083	0	0.081522	0	0.809181	0.534422	0	0	0	0
SPD-2 19	36503.7	19.3539	798.01	0	142784	0	0	0	0	4.80074	0	0	71.5582	0	0	0	0	0	0	0	0	0.4529	0.102657	0	711.355	0.332127	0.0099638	0	0.036232	0	0.4529	0.0664253	0	0.0114735	0.027174	0	0.0301933	0	0.0694447	0	1.06582	0.235508	0	0	0	0
SPD-2 20	36473.5	18.3877	782.007	0	143992	0	0	0	0	4.46861	0	0	70.3505	0	0	0	0	0	0	0	0	0	0	0.573673	727.961	0	0	0	0	0.18116	0.0573673	0	0	0	0	0	0.099638	0.0301933	0	0.00483093	1.06884	0.268721	0.205315	0	0	0.18116
SPD-2 21	36654.7	17.2102	794.085	0	141003	0	0	0	0	5.2	0	0	66.7273	0	0	0	0	0	0	0	0.0253624	0	0.00754833	0	700.485	0.175121	0.0063406	0.054348	0	0	0.27174	0.163044	0.0664253	0	0	0	0.0241547	0.00513287	0	0	1.13829	0.238527	0.0603867	0	0	0
SPD-2 22	36866.1	19.052	788.046	0	142996	0	0	0	0	4.67997	0	0	71.2563	0	0	0	0	0	0	0	0.0573673	0.220411	0	0	722.828	0.241547	0	0	0	0	0.694447	0.138889	0.111715	0	0	0	0.027174	0.0241547	0	0	1.00242	0.301933	0	0	0.0422707	0.0190218
SPD-2 23	36986.8	17.8141	806.162	0	141516	0	0	0	0	5.61596	0	0	98.4303	0	0	0	0	0	0	0	0	0.286837	0	0	496.68	0.190218	0	0	0	0	0	0	0.36232	0	0.0483093	0.0120773	0	0	0	0.0332127	0.794085	0.157005	0.0114735	0	0	0.0377417
SPD-2 24	36715.1	19.9276	798.312	0	143569	0	0	0	0	6.64253	0	0	96.3167	0	0	0	0	0	0	0	0	0	0	0	490.038	0	0	0.0875607	0	0.105677	0.129831	0	0.153986	0	0.126812	0	0	0	0	0	0.757853	0.422707	0.205315	0	0	0.018116
SPD-2 25	37017	17.3914	788.046	0	141335	0	0	0	0	8.75607	0	0	92.3916	0	0	0	0	0	0	0	0	0	0	0	501.511	0.4529	0	0.0172102	0.0262682	0	0	0	0	0	0	0	0	0.00845413	0	0	0.854471	0.141909	1.50967	0	0	0
SPD-2 26	36624.5	19.1124	801.029	0	142845	0	0	0	0	5.13287	0	0	95.7129	0	0	0	0	0	0	0	0.0220411	0	0	0	506.342	0	0	0.0166063	0	0	0	0	0	0.0603867	0	0	0	0	0.123793	0.0081522	0.694447	0.117754	0	0	0	0
SPD-2 27	36805.7	35.6281	797.406	0	141577	0	0	0	0	7.2464	0	0	95.109	0	0.208334	0	0	0	0	0.0422707	0	0.141909	0	0	502.115	0	0	0.0157005	0	0	0	0	0	0	0	0.00241547	0	0.0157005	0.172102	0	0.848433	0.126812	0	0	0.0126812	0
SPD-2 28	36624.5	18.5991	792.575	0	141577	0	0	0	0	6.09905	0	0	96.6187	0	0	0	0	0	0	0	0.0513287	0.166063	0	0	501.813	0.141909	0	0	0	0	0	0.0111715	0.120773	0	0	0	0	0	0	0.0027174	0.845413	0.196257	0	0.102657	0	0
SPD-2 29	36564.1	18.4179	765.099	0	142392	0	0	0	0	7.54833	0	0	97.8264	0	0.223431	0	0	0	0	0	0.102657	0.150967	0	0.875607	500.907	1.02657	0.054348	0	0.04529	0	0	0	0	0	0	0	0	0	0	0	0.800123	0.163044	0	0	0	0
SPD-2 30	36866.1	16.0025	799.217	0	141275	0	0	0	0	5.55557	0	0	97.5245	0	0	0	0	0	0	0	0	0.202295	0.0785027	0	502.115	0	0	0	0	0	0	0	0.0211353	0	0	0	0.063406	0	0.166063	0	0.845413	1.33153	0	0	0	0
SPD-2 31	37258.6	20.5315	796.5	0	142120	0	0	0	0	3.98552	0	0	101.45	0	0	0	0	0	0	0.0392513	0.160025	0.22645	0.0603867	0	498.19	0.138889	0	0.0845413	0.00392513	0	0	0	0	0	0.196257	0	0	0	0	0	0.67935	0.247585	0	0	0	0
SPD-2 32	36292.4	19.1124	785.027	0	140550	0	0	0	0	4.89132	0	0	103.261	0	0	0	0	0	0	0	0	0.211353	0.036232	0	491.245	0.301933	0	0.120773	0.0163044	0	0	0	0	0.0392513	0.220411	0	0	0	0	0	0.682369	0.147947	0.072464	0	0	0
SPD-2 33	36654.7	20.2295	790.159	0	141244	0	0	0	0	5.22345	0	0	99.638	0	0	0	0	0	0	0	0	0	0	0	504.229	0	0.063406	0	0	0	0	0.04529	0	0	0	0	0	0	0	0	0.766911	0.138889	0	0.0147947	0	0
SPD-2 34	36986.8	15.7307	797.406	0	142452	0	0	0	0	9.66187	0	0	101.752	0	0	0	0	0	0	0.00694447	0.0422707	0	0	0	546.499	0	0	0.0332127	0.018116	0	0	0	0	0	0	0	0.147947	0.036232	0	0.0141909	0.760872	0.123793	0	0	0	0.0422707
SPD-2 35	37168	18.8104	797.104	0	144234	0	0	0	0	8.03143	0	0	106.281	0	0	0	0	0	0	0	0.00754833	0.129831	0	0	533.818	0.150967	0	0	0	0	0.114735	0	0.178141	0	0.04529	0	0	0.0301933	0	0	0.712563	0.144928	0.105677	0	0	0
SPD-2 36	36896.2	17.3612	796.802	0	143418	0	0	0	0	6.64253	0	0	103.563	0	0	0	0	2.7174	0	0	0.0754833	0	0	0	520.533	0	0	0	0	0	0.0241547	0	0.392513	0	0	0	0	0	0	0	0.748795	0.144928	0.754833	0.0513287	0	0
SPD-2 37	36624.5	19.9276	792.273	0	143569	0	0	0	0	7.54833	0	0	97.8264	0	0	0	0	0	0	0	0	0.166063	0.099638	0	529.289	0	0.0845413	0	0	0	0	0	0	0	0	0	0.211353	0	0	0	0.706524	0.274759	0	0	0.0217392	0
SPD-2 38	37107.6	18.5387	785.63	0	141637	0	0	0	0	3.74397	0	0	56.4615	0	0	0	0	0	0	0	0	0	0	0.573673	737.623	0	0	0.0664253	0	0	0	0.0301933	0	0.0123793	0	0	0.0935993	0	0	0.0241547	1.23491	0.31703	0	0	0.0392513	0
SPD-2 39	36805.7	22.9469	788.952	0	141637	0	0	0	0	5.5	0	0	55.2538	0	0	0	0	0	0	0	0.018116	0.329107	0	0.0845413	719.507	0	0	0.102657	0	0.0241547	0.160025	0.00603867	0	0.0144928	0	0	0	0.0332127	0	0	1.093	0.332127	0.0875607	0	0.0223431	0.0277779
SPD-2 40	36956.6	21.1353	792.877	0	142603	0	0	0	0	6.12	0	0	53.7441	0	0.208334	0	0	0	0	0	0	0	0	0	737.623	1.3587	0	0.063406	0	0	0.126812	0.0392513	0	0	0.027174	0	0	0	0	0.0099638	1.46438	0.329107	0	0	0	0
SPD-2 41	36926.4	18.8708	793.179	0	141818	0	0	0	0	4.87	0	0	57.6693	0	0	0	0	0	0	0	0.0175121	0	0	0	728.867	0	0.0694447	0.0304953	0	0	0	0.0603867	0.332127	0	0	0.111715	0.054348	0	0	0	1.26208	0.368359	0.123793	0	0	0
SPD-2 42	37107.6	23.4602	794.387	0	142150	0	0	0	0	5.16306	0	0	57.3673	0	0	0	0	0	0	0.0301933	0	0	0	0.0875607	730.981	0	0	0	0	0	0.111715	0	0.072464	0	0	0	0	0	0	0	1.06884	0.365339	0	0.111715	0.0754833	0
SPD-2 43	37077.4	17.6933	773.251	0	142603	0	0	0	0	7.94085	0	0	58.877	0	0	0	0	0	0	0	0.0072464	0.208334	0	0	648.251	0	0	0	0	0	0	0	0.247585	0.0483093	0	0	0.0513287	0	0	0.0422707	1.30435	0.413649	0	0	0	0
SPD-2 44	37379.3	23.7923	821.259	0	142996	0	0	0	0	9.058	0	0	55.8577	0	0	0	0.54348	0	0	0	0.0392513	0	0	0	753.022	0	0.0286837	0	0	0	0	0.0235508	0	0	0.0845413	0	0.0072464	0	0	0.00845413	1.25	0.326088	0.13587	0	0	0.054348
SPD-2 45	37379.3	18.9916	787.442	0	143207	0	0	0	0	3.98	0	0	57.6693	0	0	0	0	0	0	0.0196257	0.0392513	0.232489	0	0.129831	733.094	0	0	0.0129831	0	0	0.4529	0	0	0	0	0	0	0	0.063406	0	1.1866	0.280798	0.00966187	0	0.0422707	0
SPD-2 46	37379.3	18.3575	790.763	0	141365	0	0	0	0.694447	5.31403	0	0	59.7828	0	0	0	0	0	0	0	0.0785027	0	0	0	736.415	0	0	0	0	0	0.072464	0	0	0.00935993	0	0	0.0483093	0.0392513	0	0	1.13527	0.320049	0.301933	0	0	0
SPD-2 47	37168	18.5387	786.536	0	142875	0	0	0	0	4.56	0	0	57.9712	0	0	0	0	0	0	0	0	0.138889	0	0	756.947	0	0	0	0	0	0.202295	0	0	0	0	0	0.0754833	0	0	0	1.18056	0.295895	0	0.0392513	0	0
SPD-2 48	37198.2	20.5315	783.819	0	141909	0	0	0	0	4.67997	0	0	54.6499	0	0	0	0	0	0	0.09058	0.0422707	0	0	0.0845413	725.244	0	0.144928	0.09058	0	0.199276	0	0	0	0	0	0	0	0	0.211353	0	1.06884	0.268721	0	0	0	0
SPD-2 49	37530.3	20.1691	786.234	0	141667	0	0	0	0	3.65339	0	0	54.348	0	0	0	0	0	0	0.166063	0	0	0.0785027	0	741.85	0	0.0178141	0	0	0	0.4529	0	0	0	0	0.0301933	0	0	0	0	1.36776	0.301933	0.0422707	0	0	0
SPD-2 50	37319	17.6631	795.292	0	142845	0	0	0	0	5.85751	0	0	53.7441	0	0	0	0	0	0	0.0513287	0	0.166063	0	0	789.254	0.214373	0	0.0694447	0	0	0	0	0	0	0	0.0132851	0.063406	0	0	0	1.2802	0.389494	0	0	0	0
SPD-3 01	37017	12.4397	743.36	0	142029	0	0	0	0	8.27297	0	0	770.836	0	0.268721	0	0	0	0	0	0.132851	0.256643	0.123793	0	147.947	0	0	0	0	0	0	0	0	0	0	0.00845413	0	0	0	0	0.144928	0	0.027174	0	0.036232	0
SPD-3 02	37107.6	13.6776	857.491	0	142482	0	0	0	0	6.76331	0	0	300.726	0	0.202295	0	0.81522	1.50967	0	0.027174	0	0.395533	0	0	314.614	0	0	0	0.0114735	0	0.4529	0	0.0422707	0.0175121	0	0	0	0.00845413	0.163044	0.04529	1.60025	0.676331	0	0.054348	0	0
SPD-3 03	36986.8	12.9831	730.679	0	142211	0	0	0	0	3.58	0	0	791.367	0	0	0	1.08696	0	0	0	0	0.081522	0	0.99638	142.814	0.283817	0	0.036232	0.0232489	0.102657	0	0	0	0.00241547	0	0	0	0	0.027174	0.0178141	0.199276	0	0	0.105677	0	0
SPD-3 04	36866.1	11.2319	734	0	143660	0	0	0	0	7.57853	0	0	805.558	0	0.123793	0	0	0	0	0	0	0	0	0	152.778	0.193237	0.0573673	0.0054348	0	0	0	0	0	0.013587	0	0	0	0	0	0.0114735	0.18116	0.0422707	0	0	0.00332127	0
SPD-3 05	36322.6	13.587	726.753	0	142633	0	0	0	0	4.01571	0	0	779.592	0	0	0	0	1.38889	0	0	0	0.114735	0	0.157005	144.022	0	0.0217392	0	0	0.483093	0.0211353	0	0.36232	0	0	0	0	0	0	0	0.307972	0.0238527	0	0	0	0
SPD-3 06	36684.9	0	589.676	0	142090	0	0	0	0	5.31403	0	0	288.768	18.1462	0	0	0	0	0	0	0	0	0	0	88	0	0	0	0	0	0	0.108696	0	0	0	0	0.027174	0	0	0	0	0.063406	0	0	0	0
SPD-3 07	37168	7.27659	578.202	0	143056	0	0	0	0	6.52176	0	0	361.896	19.0218	0.27174	0	0	0	0	0	0	0	0	0	138.587	0	0.0144928	0	0.0105677	0.0573673	0	0	0	0	0	0	0	0	0	0	0	0	0	0	0.0169083	0.0126812
SPD-3 08	37288.8	5.40461	596.922	0	141788	0	0	0	0	8.58	0	0	464.01	15.2476	0	0	0.274759	1.44928	0	0.0332127	0	0	0	0	149.457	0	0	0	0	0	0.0694447	0	0	0	0	0	0	0	0	0	0.054348	0	0.063406	0	0	0
SPD-3 09	37681.3	5.64615	592.997	0	144626	0	0	0	0	5.8877	0	0	301.752	16.8479	0	0	0.694447	0	0	0.0153986	0.0845413	0.0332127	0	0	113.527	0.250605	0	0.0265701	0	0	0.0513287	0.063406	0.13587	0.0190218	0.202295	0.0845413	0	0.00241547	0	0.0332127	0	0	0.036232	0	0	0
SPD-3 10	36715.1	8.93723	666.065	0	143177	0	0	0	0	6.31	0	0	572.464	19.8068	0	0	0	0	0	0	0	0	0.138889	0	148.189	0	0.036232	0	0.036232	0	0	0	0.211353	0	0	0	0.00785027	0	0.036232	0	0.0875607	0.259663	0.0187199	0	0.0392513	0
SPD-3 11	37017	4.61958	605.074	0	141124	0	0	0	0	7.32	0	0	430.133	62.1983	0.202295	0	0	0	0	0.0966187	0	0.18116	0	0.0422707	128.08	0	0	0	0	0	0.223431	0	0	0	0	0.00875607	0	0	0.0241547	0	0	0	0	0	0.031703	0.0422707
SPD-3 12	36564.1	8.6051	916.368	0	141516	0	0	0	0	17.5121	0	0	511.777	64.3118	0	0	0	0	0	0	0	0.368359	0	0	326.692	0	0	0	0	0.301933	0	0	0	0	0	0	0	0	0.036232	0	1.21075	0.594809	0	0	0.0211353	0.0259663
SPD-3 13	36835.9	7.18601	924.822	0	142090	0	0	0	0	18.7199	0	0	508.758	62.5002	0	0	0	0	0	0	0	0.694447	0	0.0785027	312.199	0	0.123793	0	0.0063406	0	0	0	0	0	0	0	0	0.04529	0	0.0178141	1.27718	0.766911	0	0	0	0
SPD-3 14	36896.2	8.72587	920.595	0	142814	0	0	0	0	16.3044	0	0	460.448	55.7671	0	0	0	0	0	0	0	0	0.108696	0	299.216	0	0	0	0	0	0	0	0.09058	0	0	0.0178141	0	0	0	0.00483093	0.926935	1.47947	0	0	0	0
SPD-3 15	36684.9	8.45413	810.389	0	141577	0	0	0	0	6.37079	0	0	1019.93	34.3902	0	0	0	0.72464	0	0	0	0	0	0.241547	181.22	0	0	0	0.00754833	0.27174	0	0	0	0	0	0	0	0	0.0211353	0	0.099638	0	0	0	0	0
SPD-3 16	36684.9	10.7488	762.08	0	141365	0	0	0	0	6.67273	0	0	451.933	10.1752	0	0	0	0	0	0	0	0	0.036232	0	122.102	0	0.117754	0.00966187	0	0	0.392513	0	0	0.0277779	0	0	0	0	0	0	0	0	0	0.0196257	0	0.00513287
SPD-3 17	36624.5	11.9264	759.966	0	143207	0	0	0	0	5.25364	0	0	557.367	9.69206	0	0	0	0	0	0	0	0	0	0	123.128	0	0	0.054348	0	0	0	0	0.0422707	0	0	0.111715	0.18116	0	0.0785027	0	0.0966187	0	0	0	0	0
SPD-3 18	36201.8	7.63891	792.273	0	141999	0	0	0	0	9.058	0	0	1043.78	33.7561	0.157005	0	0	0	0	0	0	0	0	0	187.863	0.247585	0	0	0	0	0	0	0	0	0	0.0150967	0.114735	0	0	0.0169083	0	0	0	0	0.0875607	0.00966187
SPD-3 19	36745.3	7.33698	916.066	0	141033	0	0	0	0.694447	13.2851	0	0	465.279	44.0823	0	0	0	0	0	0	0.0301933	0.625002	0	0.217392	339.977	0	0.0202295	0	0	0.108696	0.247585	0	0	0.00845413	0	0	0	0	0	0	1.25302	0.775969	0	0	0.0114735	0
SPD-3 20	36413.2	10.5073	773.553	0	143298	0	0	0	0	6.09905	0	0	867.756	8.81645	18.4179	0	0	0	0	0	0	0	0	0	177.537	0	0	0	0.0036232	0	0	0	0	0	0.150967	0	0.0603867	0	0	0.0422707	0.27174	0.0966187	0.081522	0	0.0150967	0
SPD-3 21	36443.3	10.4469	794.99	0	141909	0	0	0	0	7.2464	0	0	869.266	9.9638	0	0	0	0	0	0.123793	0	0	0	0	159.421	0	0	0.0108696	0	0	0.332127	0	0	0.04529	0.0241547	0.00966187	0.0935993	0	0	0	0.350243	0.365339	0	0.0392513	0	0.0664253
SPD-3 22	37077.4	9.08819	819.447	0	142060	0	0	0	0	8.75607	0	0	727.055	10.7488	0.268721	0	0	0	0	0	0.0150967	0.208334	0	0	224.035	0	0	0	0	0	0	0	0.513287	0.009058	0.0513287	0	0	0	0.0332127	0.0114735	0.495171	1.32549	0	0	0.027174	0
SPD-3 23	36564.1	9.99399	889.797	0	142331	0	0	0	0	6.61234	0	0	331.221	11.4131	0.280798	0	0	0	0	0.027174	0	0	0	0	359.301	0	0	0	0	0	0	0	0.0573673	0	0	0	0	0.0141909	0	0.0027174	1.3738	2.40641	0	0.081522	0.0483093	0
SPD-3 24	37047.2	7.88046	845.413	0	143237	0	0	0	0	7.15582	0	0	358.093	11.2017	0	0	0	0	0	0	0	0.392513	0.157005	0.036232	303.745	0	0	0	0.0208334	0.0966187	0	0	0	0	0	0	0.184179	0	0.063406	0	0.920897	0.150967	0	0	0	0.0120773
SPD-3 25	37077.4	9.72225	842.696	0	142331	0	0	0	0	5.8877	0	0	350.846	13.5568	0	0	0	0	0	0	0.0603867	0.232489	0	0	306.764	0.229469	0.0111715	0.0573673	0	0.214373	0	0.072464	0	0.0187199	0	0	0	0.0099638	0	0	0.827297	0.169083	0	0	0	0
SPD-3 26	37137.8	38.3455	871.078	0	143388	0	0	0	0	8.75607	0	0	363.83	11.2319	0	0	0	0	0	0.129831	0	0.256643	0.0966187	0	318.842	0	0	0.0105677	0.063406	0	0	0	0.027174	0	0.54348	0	0	0	0	0.0332127	1.02355	0.214373	0.193237	0	0	0.0603867
SPD-3 27	36413.2	9.11839	891.609	0	140912	0	0	0	0	6.28021	0	0	337.259	14.0399	0	0	0	0	0	0	0	0.344204	0	0	364.132	0	0	0	0.0845413	0	0	0	0	0	0	0.0132851	0.0422707	0.00603867	0.0694447	0	1.15942	1.94747	0	0	0.0754833	0
SPD-3 28	36866.1	8.42394	893.421	0	142633	0	0	0	0	7.48795	0	0	380.738	11.2017	0	0	0	0	0	1.08696	0.0483093	0.428745	0	0.392513	345.11	0	0	0.0603867	0	0	0	0	0	0.0301933	0	0	0	0.027174	0	0.018116	1.15942	2.24336	0	0	0	0
SPD-3 29	37288.8	9.17877	904.29	0	142211	0	0	0	0	8.55	0	0	329.107	11.081	0	0	0	0	0	0.301933	0	0.320049	0	0	356.583	0	0	0	0	0.0694447	0	0.0603867	0	0	0.0241547	0	0	0	0.111715	0	1.27416	2.28262	0	0	0	0
SPD-3 30	37137.8	9.54109	758.758	0	142180	0	0	0	0	5.22345	0	0	886.778	11.7754	0	0	0	0	0	0	0	0	0.187199	0.081522	148.853	0	0	0	0	0	0	0	0	0	0	0	0	0	0	0.00785027	0	0.0637079	0	0	0	0
SPD-3 31	36896.2	10.3261	922.406	0	141395	0	0	0	0	7.66911	0	0	322.465	12.0773	0	0	0	0	0	0	0	0.552538	0	0	384.361	0	0	0	0	0	0	0	0	0	0	0	0	0	0	0.0694447	1.53986	4.85509	0	0	0.063406	0
SPD-3 32	36533.9	6.85389	859.302	0	142573	0	0	0	0	6.58215	0	0	944.447	37.4397	0.0301933	0	0	0	0	0	0.0283817	0.202295	0	0.63406	130.133	0	0	0	0	0	0.072464	0	0	0	0	0	0	0	0	0.0144928	0.326088	0.235508	0	0	0	0
SPD-3 33	36322.6	8.48433	855.679	0	141577	0	0	0	0	9.058	0	0	1021.74	30.0726	0	0	0	0	0	0	0.0132851	0	0	0.0845413	88.4665	0	0.072464	0.0217392	0.0265701	0	0	0	0.13587	0	0.081522	0	0	0	0	0	0.425726	0	0	0	0.0132851	0.0483093
SPD-3 34	36171.6	6.12925	842.394	0	141758	0	0	0	0	10.8696	0	0	1014.19	108.696	0	0	0	0	0	0	0.0694447	0	0	0	115.339	0.262682	0	0	0	0.018116	0.190218	0	0	0	0.0573673	0.0241547	0	0.0223431	0.0392513	0	0.513287	0.102657	0	0	0	0
SPD-3 35	36232	6.82369	824.58	0	141848	0	0	0	0	5.97828	0	0	1096.32	80.8879	0	0	0	0	0	0	0.0220411	0	0	0	92.0897	0	0	0.18116	0.0202295	0.196257	0	0	0	0	0	0.0513287	0.132851	0	0	0.0220411	0.310991	0.0618963	0	0.0513287	0.0483093	0.00513287
SPD-3 36	36352.8	8.51452	793.783	0	142211	0	0	0	0	7.51814	0	0	1120.17	78.8046	0	0	0	0	0	0.036232	0.0785027	0	0	0	192.694	0.72464	0	0	0	0	0	0	0	0	0	0	0	0	0	0.0422707	0.603867	0	0	0.132851	0	0
SPD-3 37	36654.7	7.00485	791.065	0	142452	0	0	0	0	6.85389	0	0	1175.12	76.3287	0	0	0	0	0	0	0	0.196257	0	0	164.916	0	0	0.513287	0	0.126812	0	0	0	0	0	0.0187199	0	0.00573673	0	0.0147947	0	0	0	0	0	0
SPD-3 38	36111.2	9.058	797.104	0	141818	0	0	0	0	9.35993	0	0	1001.51	14.372	0.063406	0	0	0	0	0	0.175121	0.247585	0	0	187.863	0	0	0	0	0	0	0.0935993	0	0.0422707	0	0	0	0	0.0422707	0	0	0	0	0	0	0
SDP-4 01	36564.1	11.9566	1003.02	1.84179	142271	0	0	0	0	45.29	0.785027	0	1911.24	141.305	0	0	0.419687	36.232	0	0	0.0220411	0	0	0	4.01571	0	0.081522	0	0	0	0	0	0	0	0	0	0	0	0.241547	0	0.335146	0.0603867	0	0.0332127	0	0
SDP-4 02	36715.1	14.7343	1018.72	0	141486	0	0	0	0	53.4422	0	0	1887.08	140.097	0	0	0	38.6475	0	0.036232	0	0	1.50967	0	4.37803	0	0	0	0.0301933	0	0	0.04529	0	0	0	0	0	0.0353262	0	0	0.232489	0.0214373	0	0	0	0.0422707
SDP-4 03	36896.2	13.9191	1028.99	0	142603	0	0	0	0	44.0823	0.81522	0	1893.12	138.285	0	0	0	37.7417	0	0	0	0	0.123793	0	3.86475	0	0	0	0.0238527	0	0	0.0513287	0.301933	0.04529	0	0	0	0.04529	0.169083	0	0.298914	0	0	0.0332127	0	0
SDP-4 04	36745.3	13.2373	1902.18	0	142633	0	0	0	0	50.4229	1.02657	0	1757.25	142.814	0	0	0	36.232	0	0	0	0	0	0	4.01571	0	0.0166063	0	0	0.36232	0.301933	0.027174	0	0.0422707	0	0	0	0	0	0	0	0.0582731	0.332127	0	0	0
SDP-4 05	36322.6	13.8285	861.718	0	140218	0	0	0	0	41.9687	1.32851	0	1775.37	141.909	0	0	0.63406	36.232	0	0	0	0.199276	0	0	3.77417	0	0.00513287	0.0332127	0	0	0	0	0.27174	0	0	0.0178141	0	0	0	0	0.18116	0.0507248	0.0483093	0	0	0.0338165
SDP-4 06	36775.5	11.9566	958.94	0	142633	0	0	0	0	38.3455	0.99638	0	1150.37	143.72	0	0	0	24.1547	0	0	0	0	0	0	3.71378	0	0	0	0	0	0	0	0.114735	0	0.0935993	0	0.0845413	0	0.063406	0	0.144928	0.0323069	0	0	0	0
SDP-4 07	36745.3	14.1003	1052.24	0	142392	0	0	0	0	47.4035	1.08696	0	1878.03	143.116	0	0	0	39.5533	0	0	0	0.483093	0	0.392513	4.31765	0	0	0.0147947	0	0	0	0	0.0422707	0	0	0	0	0.00241547	0	0.0054348	0.22645	0	0	0	0	0.0202295
SDP-4 08	37077.4	15.3986	1053.75	0	142543	0	0	0	0	45.5919	0.9058	0	1865.95	141.607	0	0	0	37.1378	0	0	0	0	0.27174	0	3.89494	0	0	0	0	0	0	0.0241547	0	0.0332127	0	0	0	0	0	0.0054348	0.377417	0.0446861	0	0	0.0120773	0.0422707
SDP-4 09	36654.7	11.8358	1029.89	0	141727	0	0	0	0	46.7997	0	0	1878.03	143.72	0	0	0	37.4397	0	0	0	0	0	0	4.31765	0	0	0	0	0	0	0	0.54348	0	0	0	0.0205315	0	0	0	0.232489	0	0.09058	0	0	0
SDP-4 10	36201.8	12.3793	1006.04	0	142362	0	0	0	0	50.4229	0	0	1905.2	138.587	0	0	0	36.5339	0	0	0	0	0	0	4.58939	0	0	0	0.072464	0.099638	0	0.0483093	0	0	0	0	0	0	0	0.027174	0.217392	0	0.0664253	0.114735	0.0114735	0
SDP-4 11	36020.6	11.9264	1042.88	0	141999	0	0	0	0	47.1016	0	0	1853.87	141.305	0	0	0	36.5339	0	5.13287	0.0573673	0.36232	0.063406	0	3.80436	0	0	0	0.0153986	0	0.208334	0	0.063406	0	0	0	0.072464	0	0	0	0.190218	0	0	0	0.00332127	0
SDP-4 12	36322.6	11.1111	1025.97	0	142241	0	0	0	0	43.1765	0	0	1893.12	143.116	0	0	0	40.4591	0	0	0	0.9058	0	0.513287	4.0761	0	0	0.00966187	0	0	0	0	0	0.0603867	0	0	0	0	0	0	0.205315	0	0	0	0	0
SDP-4 13	36594.3	13.8889	1037.14	0	141999	0	0	0	0	48.9132	1.02657	0	1844.81	141.305	0	0	0	41.3649	0	0.117754	0	0.175121	0	0	3.83455	0	0	0.0268721	0	0.187199	0	0	0.0603867	0	0	0	0	0	0.301933	0	0.335146	0	0	0	0	0
SDP-4 14	36443.3	13.7984	1020.53	0	143418	0	0	0	0	50.7248	0.72464	0	1887.08	142.814	0	0	0	36.5339	0	0.00785027	0	0.18116	0.0147947	0.150967	3.56281	0	0	0	0	0	0	0	0	0	0	0	0	0	0	0.0105677	0.163044	0	0	0.0422707	0	0
SDP-4 15	36413.2	20.5315	1029.29	0	141939	0	0	0	0	45.29	0.806162	0	1871.99	143.418	0	0	0	34.4204	0	0.0513287	0	0.153986	0	0	3.89494	0	0.054348	0	0	0	0.144928	0.081522	0	0	0	0	0	0.0141909	0	0	0.175121	0.0238527	0	0	0.0205315	0.0664253
SDP-4 16	36141.4	17.5121	1026.57	0	141758	0	0	0	0	42.8745	0.694447	0	1871.99	139.191	0	0	0	38.6475	0	0	0.0392513	0	0	0.0966187	3.83455	0	0	0	0	0.0483093	0	0.0304953	0	0.0117754	0	0	0	0	0	0.0123793	0.208334	0	0	0	0	0.0199276
SDP-4 17	36564.1	13.9493	1030.8	0	143147	0	0	0	0	50.7248	0.54348	0	1908.22	144.928	0	0	0.283817	39.2513	0	0.229469	0	0	0.480074	0	4.58939	0	0	0	0.04529	0.163044	0	0.063406	0.332127	0.036232	0	0	0	0.0241547	0.099638	0	0	0.193237	0	0.0220411	0.0220411	0.0232489
SDP-4 18	36292.4	19.7766	1020.23	0	141818	0	0	0	0	48.9132	0.664253	0	1856.89	138.285	0	0	0	38.6475	0	0	0	0	0	0	4.95171	1.11715	0.0513287	0	0	0	0	0	0.0422707	0	0	0	0	0.0392513	0	0	0.244566	0	0	0	0.00694447	0
SDP-4 19	36383	13.4058	1035.93	0	143328	0	0	0	0	52.2345	0.603867	0	1873.8	139.493	0	0	0	36.8359	0	0	0	0	0	0	4.04591	0	0	0	0.0483093	0	0	0	0	0	0	0	0	0	0	0	0	0.0274759	0	0.0320049	0	0
SDP-4 20	36896.2	12.6812	1028.69	0	142663	0	0	0	0	48.6113	0	0	1868.06	138.285	0.123793	0	0	37.7417	0	0.00875607	0	0.166063	0	0	4.43842	0	0	0	0	0	0	0	0	0.0063406	0.163044	0	0.0250605	0.0184179	0	0	0.153986	0.0259663	0	0	0	0
SDP-4 21	36775.5	12.6208	1024.76	0	142784	0	0	0	0	44.3842	0	0	1881.04	146.136	0	0	0	39.5533	0	0.0603867	0	0.172102	0	0	4.40823	0	0	0	0	0	0.166063	0.0603867	0	0.0573673	0	0.0081522	0	0.0238527	0.102657	0	0.253624	0.0483093	0	0	0	0
SDP-4 22	37228.4	12.7718	983.397	0	141788	0	0	0	0	42.8745	0.754833	0	1742.16	144.324	0	0	0	39.2513	0	0	0	0	0.114735	0.0694447	3.83455	0	0	0	0	0	0.241547	0	0	0.0301933	0	0	0	0	0	0	0	0	0	0.27174	0	0.0332127
SDP-4 23	36413.2	14.9759	1009.36	0	142331	0	0	0	0	49.819	0.9058	0	1693.85	134.058	0	0	0	34.1185	0	0	0.301933	0.335146	0	0	3.6232	0	0	0	0.0244566	0	0	0	0	0	0	0	0	0	0	0	0.144928	0.0295895	0	0	0	0
SDP-4 24	36564.1	14.4928	1019.33	0	142845	0	0	0	0	44.3842	0.81522	0	1887.08	138.285	0	0	0	38.3455	0	0	0	0.138889	0	0	4.43842	0	0	0	0.00392513	0	0.22645	0	0.063406	0	0	0	0	0	0	0	0.217392	0.0256643	0	0	0	0
SDP-4 25	36050.8	13.7984	1008.46	0	142694	0	0	0	0	52.5364	0	0	1917.28	138.587	0	0	0.99638	40.4591	0	0.0392513	0	0.36232	0.0301933	0	4.13649	0.483093	0	0	0	0	0	0	0	0	0	0	0	0	0	0	0.220411	0.4529	0.0111715	0	0	0.0157005
SDP-4 26	36201.8	17.0592	1025.97	0	141727	0	0	0	0	42.2707	0	0	1878.03	144.928	0.332127	0	0	40.4591	0	1.38889	0	0.172102	0.301933	0	3.80436	0	0	0.0513287	0	0	0	0	0	0	0	0	0	0	0	0	0	0	0	0.0754833	0	0
SDP-4 27	36684.9	16.0025	1031.1	0	142150	0	0	0	0	47.4035	0	0	1914.26	136.474	0	0	0	37.1378	0	0	0.147947	0	0	0.301933	4.77055	0	0	0	0	0	0	0	0.27174	0	0.211353	0	0	0	0	0	0.196257	0	0.111715	0.0664253	0.054348	0
SDP-4 28	36503.7	15.0061	1008.46	0	141546	0	0	0	0	47.1016	0.72464	0	1911.24	139.795	0	0	0	38.3455	0	0	0	0	0.063406	0	4.28745	0.422707	0	0.099638	0	0	0	0	0	0	0	0	0	0	0.09058	0	0	0	0	0	0	0
SDP-4 29	36533.9	13.9795	1007.25	0	141365	0	0	0	0	49.819	0.694447	0	1905.2	135.266	0	0	0	38.9494	0	0	0	0	0	0.422707	4.49881	0	0	0	0.0072464	0	0	0	0	0.00301933	0.129831	0	0.120773	0	0	0	0.307972	0.0187199	0	0	0	0.0341185
SDP-4 30	36050.8	12.802	1001.81	0	142029	0	0	0	0	44.3842	0.99638	0	1902.18	142.814	0	0	0	41.0629	0	0	0	0.141909	0	0	4.46861	0	0.054348	0	0	0	0	0	0	0	0	0	0	0.00332127	0.166063	0	0.211353	0	0	0	0	0
SDP-4 31	36866.1	12.0471	1037.14	0	141848	0	0	0	0	45.5919	0	0	1923.32	144.022	0.036232	0	0	37.7417	0	0	0	0.286837	0.00694447	0.169083	4.0761	0.81522	0	0	0	0	0	0	0.123793	0.0392513	0	0	0.141909	0.00603867	0.0392513	0.0301933	0.22645	0.0169083	0	0	0	0
SDP-4 32	36745.3	13.7078	1018.72	0	141999	0	0	0	0	47.7055	0.754833	0	1899.16	139.191	0	0	0	37.4397	0	0.0845413	0	0	0.0175121	0.160025	3.59301	0	0	0	0.004529	0.664253	0	0.04529	0	0	0	0	0.0157005	0	0.120773	0	0.229469	0.04529	0.196257	0	0	0
SDP-4 33	36232	13.1643	988.53	0	141758	0	0	0	0	57.6693	1.57005	0	1878.03	147.042	0	0	0	33.2127	0	0.356281	0	0	0	0	3.92513	0	0.0157005	0.00875607	0.0483093	0	0	0.0483093	0.0694447	0.0163044	0	0.00211353	0	0.004529	0	0.0102657	0.283817	0	0.111715	0	0	0
SDP-4 34	36654.7	14.2513	1014.5	0	142271	0	0	0	0	46.1958	0.845413	0	1902.18	145.23	0	0	0	36.5339	0	0.0513287	0.04529	0.184179	0	0	4.04591	1.08696	0.0220411	0	0	0.256643	0	0	0	0	0	0	0.0211353	0.00573673	0.0422707	0	0.223431	0.184179	0	0	0	0
SDP-4 35	36835.9	13.4662	1022.35	0	142090	0	0	0	0	52.8383	0.640099	0	1835.75	142.211	0	0	0	36.5339	0	0	0	0	0	0	3.74397	0	0	0	0	0	0	0	0	0	0.123793	0	0.0205315	0	0	0.0483093	0.217392	0	0.102657	0	0	0.0754833
SDP-4 36	36775.5	12.7114	1074.88	0	142060	0	0	0	0	42.5726	0	0	1826.7	138.889	0.0483093	0	0	34.7223	0	2.05315	0.0694447	0	0	0	4.13649	0	0	0.0694447	0.0202295	0.208334	0	0	0.256643	0.0301933	0.0573673	0	0	0	0	0	0.238527	0.0250605	0.144928	0.0301933	0	0.027174
SDP-4 37	36926.4	12.6812	1048.92	0	143690	0	0	0	0	46.7997	1.05677	0	1935.39	138.889	0.603867	0	0	38.0436	0	1.53986	0	0	0	0	5.01209	0	0	0	0	0	0	0	0	0	0	0	0	0.0147947	0.0845413	0	0.175121	0	0	0	0	0
SDP-4 38	36533.9	12.7718	1025.06	0	141214	0	0	0	0	47.4035	0	0	1902.18	142.513	0	0	0	40.1571	0	0.0392513	0	0	0	1.05677	3.83455	0	0	0	0.0332127	0	0.483093	0.241547	0	0	0	0	0	0	0	0	0.292875	0.063406	0	0	0	0
SDP-4 39	36383	11.5339	1013.59	0	141305	0	0	0	0	48.3093	0	0	1896.14	140.399	0	0	0	38.6475	0	0	0	0	0	0	3.98552	0	0.0117754	0	0	0	0	0	0	0	0.0332127	0.00966187	0	0	0	0	0.314011	0	0.132851	0	0.0754833	0

## Sheet: Table S3
Table S3 LA-MC-ICP-MS Li isotope results of the spodumene reference materials
No.	Sample	7Li (V)	δ7Li (‰)	2SE		No.	Sample	7Li (V)	δ7Li (‰)	2SE		No.	Sample	7Li (V)	δ7Li (‰)	2SE		No.	Sample	7Li (V)	δ7Li (‰)	2SE		No.	Sample	7Li (V)	δ7Li (‰)	2SE
1	80017-01	1.742	0.288708	0.507807		1	R121-SPD-1-01	1.731	5.44092	0.450442		1	R121-SPD-2-01	1.535	7.97897	0.520774		1	R121-SPD-3-01	2.537	4.95	0.470425		1	R121-SPD-4-01	2.455	12.41	0.560357
2	80017-02	1.794	-0.171264	0.540259		2	R121-SPD-1-02	1.727	5.47905	0.544993		2	R121-SPD-2-02	1.562	8.36823	0.562915		2	R121-SPD-3-02	2.568	5.05	0.460435		2	R121-SPD-4-02	2.463	12.24	0.510392
3	80017-03	1.718	0.218876	0.540288		3	R121-SPD-1-03	1.769	5.30143	0.540981		3	R121-SPD-2-03	1.533	8.53911	0.598458		3	R121-SPD-3-03	2.575	4.7	0.470425		3	R121-SPD-4-03	2.459	12.42	0.430465
4	80017-04	1.728	-0.326622	0.561855		4	R121-SPD-1-04	1.777	5.38706	0.551123		4	R121-SPD-2-04	1.529	8.18463	0.567392		4	R121-SPD-3-04	2.555	5.23	0.480416		4	R121-SPD-4-04	2.445	12.24	0.480416
5	80017-05	1.737	0.0317086	0.502514		5	R121-SPD-1-05	1.729	5.40942	0.513314		5	R121-SPD-2-05	1.554	7.98213	0.526867		5	R121-SPD-3-05	2.567	5.17	0.550364		5	R121-SPD-4-05	2.501	12.34	0.460435
6	80017-06	1.698	-0.364569	0.472536		6	R121-SPD-1-06	1.685	5.27687	0.473966		6	R121-SPD-2-06	1.532	8.12103	0.517339		6	R121-SPD-3-06	2.523	4.93	0.590339		6	R121-SPD-4-06	2.371	12.41	0.480416
7	80017-07	1.746	-0.228241	0.5101		7	R121-SPD-1-07	1.691	5.30843	0.480817		7	R121-SPD-2-07	1.518	7.95654	0.494639		7	R121-SPD-3-07	2.555	4.92	0.520384		7	R121-SPD-4-07	2.454	12.64	0.520384
8	80017-08	1.715	-0.171125	0.499795		8	R121-SPD-1-08	1.684	5.53036	0.476947		8	R121-SPD-2-08	1.527	8.28223	0.61779		8	R121-SPD-3-08	2.548	5.49	0.600333		8	R121-SPD-4-08	2.424	12.77	0.610328
9	80017-09	1.691	-0.0443678	0.48379		9	R121-SPD-1-09	1.704	5.36205	0.487687		9	R121-SPD-2-09	1.683	8.5669	0.648597		9	R121-SPD-3-09	2.57	5.26	0.670298		9	R121-SPD-4-09	2.444	11.93	0.530377
10	80017-10	1.702	-0.0918847	0.532482		10	R121-SPD-1-10	1.71	5.29863	0.476778		10	R121-SPD-2-10	1.5	8.2787	0.63479		10	R121-SPD-3-10	2.571	5.61	0.520384		10	R121-SPD-4-10	2.516	12.63	0.780256
11	80017-11	1.685	0.22812	0.591835		11	R121-SPD-1-11	1.673	5.26125	0.585449		11	R121-SPD-2-11	1.33	8.32322	0.677323		11	R121-SPD-3-11	2.526	5.21	0.530377		11	R121-SPD-4-11	2.403	12.35	0.510392
12	80017-12	1.646	-0.285032	0.588567		12	R121-SPD-1-12	1.672	5.71135	0.503766		12	R121-SPD-2-12	1.461	8.24891	0.606941		12	R121-SPD-3-12	2.561	5.22	0.450444		12	R121-SPD-4-12	2.448	12.61	0.630317
13	80017-13	1.664	0.351599	0.544818		13	R121-SPD-1-13	1.697	5.36298	0.518812		13	R121-SPD-2-13	1.479	7.97724	0.613643		13	R121-SPD-3-13	2.476	5.18	0.580345		13	R121-SPD-4-13	2.424	12.43	0.560357
14	80017-14	1.648	-0.152002	0.479564		14	R121-SPD-1-14	1.698	5.4327	0.530434		14	R121-SPD-2-14	1.449	8.35364	0.587434		14	R121-SPD-3-14	2.504	4.93	0.600333		14	R121-SPD-4-14	2.369	12.28	0.570351
15	80017-15	1.634	0.050674	0.464642		15	R121-SPD-1-15	1.749	5.33749	0.508873		15	R121-SPD-2-15	1.465	7.97718	0.621868		15	R121-SPD-3-15	2.491	5.28	0.570351		15	R121-SPD-4-15	2.426	12.4	0.570351
16	80017-16	1.665	-0.237473	0.498655		16	R121-SPD-1-16	1.657	5.6671	0.472983		16	R121-SPD-2-16	1.474	8.14144	0.627961		16	R121-SPD-3-16	2.531	5.42	0.570351		16	R121-SPD-4-16	2.417	12.06	0.580345
17	80017-17	1.677	0.0854801	0.502112		17	R121-SPD-1-17	1.643	5.35393	0.529736		17	R121-SPD-2-17	1.458	7.9801	0.585246		17	R121-SPD-3-17	2.493	4.85	0.600333		17	R121-SPD-4-17	2.414	12.35	0.620322
18	80017-18	1.646	0.0949529	0.542092		18	R121-SPD-1-18	1.61	5.49967	0.584461		18	R121-SPD-2-18	1.359	8.44119	0.68513		18	R121-SPD-3-18	2.519	4.75	0.530377		18	R121-SPD-4-18	2.391	12.35	0.570351
19	80017-19	1.602	0.0443055	0.538357		19	R121-SPD-1-19	1.625	5.23376	0.605556		19	R121-SPD-2-19	1.472	8.35943	0.555812		19	R121-SPD-3-19	2.501	4.81	0.510392		19	R121-SPD-4-19	2.402	12.15	0.620322
20	80017-20	1.595	-0.132894	0.559317		20	R121-SPD-1-20	1.655	5.20239	0.589218		20	R122-SPD-2-01	2.356	8.49946	0.596765		20	R121-SPD-3-20	2.518	5.06	0.490408		20	R121-SPD-4-20	2.426	12.44	0.620322
21	80017-21	1.626	0.306977	0.548158		21	R121-SPD-1-21	1.629	5.35143	0.536728		21	R122-SPD-2-02	2.364	8.78324	0.596703		21	R121-SPD-3-21	2.478	4.86	0.520384		21	R121-SPD-4-21	2.383	12.57	0.570351
22	80017-22	1.6	0.208826	0.513371		22	R121-SPD-1-22	1.615	5.42731	0.4446		22	R122-SPD-2-03	2.347	8.35788	0.604244		22	R121-SPD-3-22	2.491	4.51	0.54037		22	R121-SPD-4-22	2.457	12.93	0.680294
23	80017-23	1.594	-0.0790741	0.541636		23	R121-SPD-1-23	1.616	5.54133	0.484136		23	R122-SPD-2-04	2.388	8.57075	0.550876		23	R121-SPD-3-23	2.485	4.81	0.5004		23	R121-SPD-4-23	2.376	12.95	0.610328
24	80017-24	1.593	0.24674	0.622772		24	R121-SPD-1-24	1.596	5.26899	0.47995		24	R122-SPD-2-05	2.399	8.56122	0.877567		24	R121-SPD-3-24	2.479	4.65	0.550364		24	R122-SPD-4-01	2.446	12.4693	0.503904
25	80017-25	1.582	0.0442542	0.548006		25	R121-SPD-1-25	1.593	5.345	0.4725		25	R122-SPD-2-06	2.355	8.78702	0.900888		25	R122-SPD-3-01	2.605	4.9933	0.605215		25	R122-SPD-4-02	2.457	12.1083	0.582233
26	80017-26	1.542	-0.227458	0.652369		26	R121-SPD-1-26	1.607	5.2155	0.517688		26	R122-SPD-2-07	2.348	8.73538	0.900973		26	R122-SPD-3-02	2.598	4.54808	0.537514		26	R122-SPD-4-03	2.473	12.4328	0.505908
27	80017-27	1.561	0.132697	0.661205		27	R121-SPD-1-27	1.634	5.1965	0.510175		27	R122-SPD-2-08	2.378	8.51559	0.499844		27	R122-SPD-3-03	2.603	4.7317	0.507891		27	R122-SPD-4-04	2.483	12.9293	0.502795
28	80017-28	1.559	0.224343	0.616996		28	R122-SPD-1-01	2.408	5.97439	0.55186		28	R122-SPD-2-09	2.427	8.29303	0.631057		28	R122-SPD-3-04	2.628	4.88012	0.542616		28	R122-SPD-4-05	2.437	12.8264	0.553407
29	80017-29	1.512	-0.110576	0.640759		29	R122-SPD-1-02	2.38	5.53578	0.591349		29	R122-SPD-2-10	2.372	8.68654	0.643008		29	R122-SPD-3-05	2.656	4.61657	0.530632		29	R122-SPD-4-06	2.44	12.9876	0.525926
30	80017-30	1.514	0.262193	0.661229		30	R122-SPD-1-03	2.408	5.92272	0.485259		30	R122-SPD-2-11	2.362	8.26714	0.578749		30	R122-SPD-3-06	2.632	4.51691	0.52618		30	R122-SPD-4-07	2.445	12.5836	0.520549
31	80017-31	1.541	0.202168	0.616989		31	R122-SPD-1-04	2.385	5.98073	0.489787		31	R122-SPD-2-12	2.356	8.38636	0.695059		31	R122-SPD-3-07	2.627	4.6201	0.503765		31	R122-SPD-4-08	2.458	12.5836	0.557164
32	80017-32	1.513	-0.07	0.43		32	R122-SPD-1-05	2.388	5.74849	0.469176		32	R122-SPD-2-13	2.393	8.4315	0.672774		32	R122-SPD-3-08	2.583	4.85191	0.545803		32	R122-SPD-4-09	2.458	12.5941	0.52061
33	80017-33	1.515	-0.21	0.59		33	R122-SPD-1-06	2.364	5.86469	0.548012		33	R122-SPD-2-14	2.388	8.46979	0.669618		33	R122-SPD-3-09	2.586	4.79385	0.481377		33	R122-SPD-4-10	2.47	12.6586	0.569151
34	80017-34	1.522	0.03	0.56		34	R122-SPD-1-07	2.391	5.61957	0.587724		34	R122-SPD-2-15	2.407	8.39887	0.660939		34	R122-SPD-3-10	2.558	5.08072	0.638287		34	R122-SPD-4-11	2.46	12.5648	0.549283
35	80017-35	1.519	0.02	0.55		35	R122-SPD-1-08	2.402	5.85489	0.58419		35	R122-SPD-2-16	2.361	7.95086	0.607077		35	R122-SPD-3-11	2.527	4.95169	0.613897		35	R122-SPD-4-12	2.452	12.8228	0.464998
36	80017-36	1.535	-0.11	0.47		36	R122-SPD-1-09	2.413	6.26138	0.607133		36	R122-SPD-2-17	2.371	8.34413	0.623357		36	R122-SPD-3-12	2.55	5.10656	0.583255		36	R122-SPD-4-13	2.476	12.4088	0.56024
37	80017-37	1.511	0.27	0.49		37	R122-SPD-1-10	2.355	6.12911	0.551472		37	R122-SPD-2-18	2.367	7.7832	0.610711		37	R122-SPD-3-13	2.55	5.09365	0.575471		37	R122-SPD-4-14	2.459	12.5377	0.537297
38	80017-38	1.495	-0.26	0.55		38	R122-SPD-1-11	2.355	5.97773	0.540856		38	R122-SPD-2-19	2.364	7.85387	0.49743		38	R122-SPD-3-14	2.496	4.68771	0.482214		38	R122-SPD-4-15	2.44	12.6024	0.529204
39	80017-39	1.508	0.15	0.6		39	R122-SPD-1-12	2.35	5.7584	0.533191		39	R122-SPD-2-20	2.397	7.70254	0.51459		39	R122-SPD-3-15	2.533	4.78446	0.492869		39	R122-SPD-4-16	2.46	12.6282	0.540607
40	80017-40	2.593	0.2	0.58		40	R122-SPD-1-13	2.416	5.35851	0.529458		40	R122-SPD-2-21	2.363	8.33773	0.596983		40	R122-SPD-3-16	2.512	4.79438	0.506122		40	R122-SPD-4-17	2.464	12.2637	0.507072
41	80017-41	2.603	-0.13	0.54		41	R122-SPD-1-14	2.378	5.74535	0.508985		41	R122-SPD-2-22	2.395	8.22168	0.558997		41	R122-SPD-3-17	2.566	4.85887	0.49762		41	R122-SPD-4-18	2.419	12.5795	0.503149
42	80017-42	2.587	0.11	0.5		42	R122-SPD-1-15	2.381	5.65504	0.582951		42	R122-SPD-2-23	2.415	8.10868	0.639528		42	R122-SPD-3-18	2.577	4.50761	0.465722		42	R122-SPD-4-19	2.471	11.9692	0.483586
43	80017-43	2.576	0.19	0.46		43	R122-SPD-1-16	2.371	5.65837	0.555593		43	R122-SPD-2-24	2.381	7.69611	0.560512		43	R122-SPD-3-19	2.548	4.75265	0.469479		43	R122-SPD-4-20	2.463	12.2205	0.487806
44	80017-44	2.606	-0.1	0.49		44	R122-SPD-1-17	2.429	6.37432	0.555503		44	R122-SPD-2-25	2.358	8.46005	0.530548		44	R122-SPD-3-20	2.571	4.94275	0.500135		44	R122-SPD-4-21	2.466	11.9334	0.518977
45	80017-45	2.589	-0.05	0.5		45	R122-SPD-1-18	2.372	5.51657	0.532712		45	R122-SPD-2-26	2.312	8.66386	0.542439		45	R122-SPD-3-21	2.536	4.82022	0.522211		45	R122-SPD-4-22	2.408	11.9463	0.454062
46	80017-46	2.599	0.01	0.55		46	R122-SPD-1-19	2.273	6.29052	0.585097		46	R122-SPD-2-27	2.353	8.3672	0.530417		46	R122-SPD-3-22	2.52	5.00756	0.486646		46	R122-SPD-4-23	2.458	12.4173	0.44628
47	80017-47	2.605	0.26	0.55		47	R122-SPD-1-20	2.354	5.46206	0.552729		47	R122-SPD-2-28	2.358	8.5448	0.615719		47	R122-SPD-3-23	2.515	5.11072	0.482623		47	R122-SPD-4-24	2.453	12.2819	0.477617
48	80017-48	2.587	0.17	0.49		48	R122-SPD-1-21	2.33	5.86185	0.509937		48	R122-SPD-2-29	2.365	8.4932	0.557437		48	R122-SPD-3-24	2.52	4.65673	0.488518		48	R122-SPD-4-25	2.461	12.1467	0.483899
49	80017-49	2.563	0.22	0.45		49	R122-SPD-1-22	2.355	5.3624	0.528441		49	R122-SPD-2-30	2.4	8.23492	0.538508		49	R122-SPD-3-25	2.538	4.7921	0.522309		49	R122-SPD-4-26	2.46	12.5785	0.48021
50	80017-50	2.577	-0.31	0.49		50	R122-SPD-1-23	2.373	5.44914	0.526093		50	R122-SPD-2-31	2.337	8.45419	0.551863		50	R122-SPD-3-26	2.531	4.71175	0.562707		50	R122-SPD-4-27	2.385	12.2521	0.464587
51	80017-51	2.586	0.25	0.52		51	R122-SPD-1-24	2.373	5.62969	0.564295		51	R123-SPD-2-01	2.353	8.47117	0.508095		51	R122-SPD-3-27	2.516	4.73753	0.559019		51	R122-SPD-4-28	2.384	11.9609	0.484555
52	80017-52	2.519	-0.06	0.55		52	R122-SPD-1-25	2.356	5.43639	0.504859		52	R123-SPD-2-02	2.365	8.12345	0.533545		52	R122-SPD-3-28	2.514	4.47048	0.508901		52	R122-SPD-4-29	2.396	11.7737	0.463816
53	80017-53	2.536	-0.25	0.54		53	R122-SPD-1-26	2.342	5.54273	0.504456		53	R123-SPD-2-03	2.374	8.31663	0.536954		53	R122-SPD-3-29	2.515	4.75404	0.487246		53	R122-SPD-4-30	2.428	12.3101	0.43879
54	80017-54	2.487	0.32	0.56		54	R122-SPD-1-27	2.335	5.57149	0.489903		54	R123-SPD-2-04	2.351	8.31016	0.549162		54	R122-SPD-3-30	2.504	4.7282	0.47834		54	R122-SPD-4-31	2.438	12.2108	0.429634
55	80017-55	2.503	-0.27	0.5		55	R122-SPD-1-28	2.348	5.81011	0.493883		55	R123-SPD-2-05	2.386	8.26508	0.545808		55	R122-SPD-3-31	2.484	4.76687	0.508223		55	R122-SPD-4-32	2.447	12.417	0.477438
56	80017-56	2.502	0.04	0.56		56	R122-SPD-1-29	2.364	5.65545	0.483286		56	R123-SPD-2-06	2.335	8.44538	0.523872		56	R122-SPD-3-32	2.54	5.01159	0.485039		56	R122-SPD-4-33	2.408	12.5075	0.529065
57	80017-57	2.495	0.18	0.57		57	R122-SPD-1-30	2.34	5.12668	0.51751		57	R123-SPD-2-07	2.4	8.2554	0.450021		57	R122-SPD-3-33	2.517	4.65067	0.493124		57	R122-SPD-4-34	2.441	12.1014	0.536698
58	80017-58	2.514	0.1	0.56		58	R123-SPD-1-01	2.393	5.49944	0.497155		58	R123-SPD-2-08	2.381	8.29404	0.480024		58	R122-SPD-3-34	2.508	4.88308	0.518613		58	R122-SPD-4-35	2.438	12.1848	0.56967
59	80017-59	2.515	0.05	0.59		59	R123-SPD-1-02	2.413	5.58315	0.528872		59	R123-SPD-2-09	2.361	8.50008	0.469415		59	R122-SPD-3-35	2.459	4.79286	0.503949		59	R122-SPD-4-36	2.424	12.2686	0.546681
60	80017-60	2.513	0.25	0.61		60	R123-SPD-1-03	2.401	5.26118	0.532732		60	R123-SPD-2-10	2.38	8.45209	0.524958		60	R122-SPD-3-36	2.476	4.89926	0.561877		60	R122-SPD-4-37	2.431	12.5592	0.506
61	80017-61	2.52	0.03	0.65		61	R123-SPD-1-04	2.414	5.56996	0.467578		61	R123-SPD-2-11	2.367	8.48429	0.517816		61	R122-SPD-3-37	2.492	4.54486	0.63708		61	R122-SPD-4-38	2.483	12.4561	0.492519
62	80017-62	2.508	-0.03	0.63		62	R123-SPD-1-05	2.427	5.74386	0.514352		62	R123-SPD-2-12	2.379	8.51005	0.482817		62	R122-SPD-3-38	2.456	4.99228	0.600352		62	R122-SPD-4-39	2.427	12.628	0.503964
63	80017-63	2.514	-0.270882	0.505008		63	R123-SPD-1-06	2.389	5.70522	0.480891		63	R123-SPD-2-13	2.417	8.35541	0.496749		63	R122-SPD-3-39	2.527	5.23719	0.589694		63	R122-SPD-4-40	2.448	12.6924	0.529402
64	80017-64	2.517	0.251615	0.480783		64	R123-SPD-1-07	2.421	5.87591	0.487144		64	R123-SPD-2-14	2.345	8.47776	0.538464		64	R123-SPD-3-01	2.335	5.14427	0.527204		64	R122-SPD-4-41	2.463	12.7385	0.507329
65	80017-65	2.518	0.361323	0.616458		65	R123-SPD-1-08	2.392	5.9532	0.451666		65	R123-SPD-2-15	2.395	8.57436	0.47376		65	R123-SPD-3-02	2.376	4.91275	0.544478		65	R122-SPD-4-42	2.412	12.7127	0.53723
66	80017-66	2.481	-0.235428	0.583204		66	R123-SPD-1-09	2.384	5.94676	0.44091		66	R123-SPD-2-16	2.339	8.49052	0.511122		66	R123-SPD-3-03	2.367	4.35323	0.530654		66	R123-SPD-4-01	2.351	12.4682	0.593186
67	80017-67	2.493	-0.0354755	0.535886		67	R123-SPD-1-10	2.388	5.57625	0.503649		67	R123-SPD-2-17	2.369	8.58067	0.514853		67	R123-SPD-3-04	2.365	4.72839	0.438044		67	R123-SPD-4-02	2.352	11.998	0.610836
68	80017-68	2.501	0.31608	0.493827		68	R123-SPD-1-11	2.397	5.68576	0.475771		68	R123-SPD-2-18	2.359	8.67082	0.476794		68	R123-SPD-3-05	2.357	4.73482	0.464175		68	R123-SPD-4-03	2.334	11.7532	0.610871
69	80017-69	2.441	-0.232179	0.552365		69	R123-SPD-1-12	2.423	5.56981	0.507395		69	R123-SPD-2-19	2.337	8.74517	0.517784		69	R123-SPD-3-06	2.36	4.65761	0.44521		69	R123-SPD-4-04	2.3	12.4434	0.561232
70	80017-70	2.465	0.0161259	0.574544		70	R123-SPD-1-13	2.404	5.77585	0.519666		70	R123-SPD-2-20	2.388	8.53263	0.510904		70	R123-SPD-3-07	2.375	4.66735	0.456231		70	R123-SPD-4-05	2.353	12.1149	0.542509
71	80017-71	2.455	0	0.592153		71	R123-SPD-1-14	2.371	6.22036	0.499032		71	R123-SPD-2-21	2.388	8.42315	0.563715		71	R123-SPD-3-08	2.359	4.81534	0.480698		71	R123-SPD-4-06	2.343	12.2566	0.502892
72	80017-72	2.446	-0.145089	0.543898		72	R123-SPD-1-15	2.368	6.38785	0.530604		72	R123-SPD-2-22	2.388	8.47451	0.498832		72	R123-SPD-3-09	2.334	5.0534	0.452278		72	R123-SPD-4-07	2.325	12.7187	0.517841
73	80017-73	2.476	0.177324	0.531864		73	R123-SPD-1-16	2.087	5.52767	0.480771		73	R123-SPD-2-23	2.402	8.42299	0.536186		73	R123-SPD-3-10	2.379	4.76708	0.521824		73	R123-SPD-4-08	2.319	12.8154	0.511289
74	80017-74	2.444	0.20957	0.508361		74	R123-SPD-1-17	2.433	6.14618	0.458348		74	R123-SPD-2-24	2.381	8.48095	0.536176		74	R123-SPD-3-11	2.37	4.88933	0.525025		74	R123-SPD-4-09	2.356	12.6077	0.576025
75	80017-75	2.469	-0.199631	0.497231		75	R123-SPD-1-18	2.374	5.79827	0.469294		75	R123-SPD-2-25	2.382	8.35838	0.600674		75	R123-SPD-3-12	2.391	4.73491	0.538494		75	R123-SPD-4-10	2.224	12.5239	0.548264
76	80017-76	2.466	0.212832	0.497331		76	R123-SPD-1-19	2.352	6.24601	0.518909		76	R123-SPD-2-26	2.375	8.55154	0.580917		76	R123-SPD-3-13	2.377	5.21718	0.526539		76	R123-SPD-4-11	2.487	12.1822	0.612972
77	80017-77	2.469	0.0386944	0.537533		77	R123-SPD-1-20	2.374	6.18157	0.48152		77	R123-SPD-2-27	2.326	8.13302	0.580974		77	R123-SPD-3-14	2.362	4.85036	0.522918		77	R123-SPD-4-12	2.394	12.1734	0.515923
78	80017-78	2.441	0.0129003	0.574244		78	R123-SPD-1-21	2.395	5.98828	0.488578		78	R123-SPD-2-28	2.364	8.13913	0.593785		78	R123-SPD-3-15	2.358	4.99838	0.489213		78	R123-SPD-4-13	2.374	12.4506	0.537747
79	80017-79	2.416	-0.132238	0.910606		79	R123-SPD-1-22	2.408	5.76297	0.553572		79	R123-SPD-2-29	2.37	7.99107	0.574702		79	R123-SPD-3-16	2.385	5.19116	0.470071		79	R123-SPD-4-14	2.372	12.4893	0.588642
80	80017-80	2.441	0.032257	0.89626		80	R123-SPD-1-23	2.395	6.13661	0.546867		80	R123-SPD-2-30	2.4	8.13913	0.554962		80	R123-SPD-3-17	2.357	5.08174	0.470089		80	R123-SPD-4-15	2.378	12.0598	0.419803
81	80017-81	2.423	-0.296673	0.891632		81	R123-SPD-1-24	2.397	6.14949	0.53732		81	R123-SPD-2-31	2.383	8.01674	0.508026		81	R123-SPD-3-18	2.377	4.92083	0.502279		81	R123-SPD-4-16	2.375	12.2854	0.502171
82	80017-82	2.437	0.232198	0.687255		82	R123-SPD-1-25	2.411	5.72789	0.556849		82	R123-SPD-2-32	2.403	8.0618	0.480202		82	R123-SPD-3-19	2.375	5.37444	0.493212		82	R123-SPD-4-17	2.111	12.9376	0.462547
83	80017-83	2.458	-0.157978	0.6697		83	R123-SPD-1-26	2.38	5.83737	0.539968		83	R123-SPD-2-33	2.392	7.7979	0.49186		83	R123-SPD-3-20	2.334	5.49031	0.555675		83	R123-SPD-4-18	2.107	12.9247	0.4724
84	80017-84	2.432	-0.0451322	0.712245		84	R123-SPD-1-27	2.402	6.03701	0.533593		84	R123-SPD-2-34	2.372	7.90735	0.447175		84	R123-SPD-3-21	2.358	5.45169	0.548154		84	R123-SPD-4-19	2.441	12.1629	0.465094
85	80017-85	2.469	0.212737	0.574768		85	R123-SPD-1-28	2.404	5.58936	0.469302		85	R123-SPD-2-35	2.418	7.88804	0.492083		85	R123-SPD-3-22	2.367	5.30692	0.574503		85	R123-SPD-4-20	2.382	12.3497	0.480726
86	80017-86	2.412	0.19661	0.55171		86	R123-SPD-1-29	2.395	5.79545	0.478622		86	R123-SPD-2-36	2.35	8.19057	0.468998		86	R123-SPD-3-23	2.331	5.12026	0.567981		86	R123-SPD-4-21	2.389	12.0726	0.487897
87	80017-87	2.412	-0.183713	0.551774		87	R123-SPD-1-30	2.404	5.58936	0.517676		87	R123-SPD-2-37	2.368	8.48687	0.550751		87	R123-SPD-3-24	2.366	5.57726	0.558512		87	R123-SPD-4-22	2.388	12.1048	0.514592
88	80017-88	2.392	-0.132149	0.577282		88	R123-SPD-1-31	2.381	5.93051	0.476996		88	R123-SPD-2-38	2.369	7.99761	0.554621		88	R123-SPD-3-25	2.449	5.31638	0.596193		88	R123-SPD-4-23	2.414	12.5182	0.505843
89	80017-89	2.468	0.312698	0.563592		89	R123-SPD-1-32	2.393	6.03357	0.459898		89	R123-SPD-2-39	2.345	8.22936	0.522455		89	R123-SPD-3-26	2.409	5.11681	0.612223		89	R123-SPD-4-24	2.397	12.2797	0.502253
90	80017-90	2.402	0.0741531	0.583835		90	R123-SPD-1-33	2.394	5.87897	0.469977		90	R123-SPD-2-40	2.351	7.96548	0.560017		90	R123-SPD-3-27	2.353	5.3035	0.584362		90	R123-SPD-4-25	2.396	12.1701	0.513325
91	80017-91	2.431	-0.00644953	0.597002		91	R123-SPD-1-34	2.398	5.93063	0.53029		91	R123-SPD-2-41	2.384	8.0878	0.539232		91	R123-SPD-3-28	2.349	5.60292	0.528811		91	R123-SPD-4-26	2.122	12.5052	0.485711
92	80017-92	2.421	-0.193536	0.518101		92	R123-SPD-1-35	2.349	5.96928	0.507699		92	R123-SPD-2-42	2.348	8.0041	0.545951		92	R123-SPD-3-29	2.275	4.5601	0.568594		92	R123-SPD-4-27	2.118	12.8594	0.533425
93	80017-93	2.408	-0.199933	0.521523		93	R123-SPD-1-36	2.41	5.76961	0.490443		93	R123-SPD-2-43	2.365	8.44214	0.50953		93	R123-SPD-3-30	2.339	5.37118	0.5425		93	R123-SPD-4-28	2.417	12.3185	0.447783
94	80017-94	2.356	0.125803	0.565842		94	R123-SPD-1-37	2.351	5.60239	0.537029		94	R123-SPD-2-44	2.36	8.35843	0.521216		94	R123-SPD-3-31	2.344	5.02066	0.52372		94	R123-SPD-4-29	2.334	12.2798	0.455256
95	80017-95	2.393	-0.251569	0.556155		95	R123-SPD-1-38	2.382	5.64103	0.493994		95	R123-SPD-2-45	2.398	8.64819	0.498301		95	R123-SPD-3-32	2.34	5.23949	0.519978		95	R123-SPD-4-30	2.38	12.1638	0.462978
96	80017-96	2.398	0.0516056	0.552555		96	R123-SPD-1-39	2.383	5.80202	0.493969		96	R123-SPD-2-46	2.372	8.28783	0.485513		96	R123-SPD-3-33	2.333	5.43901	0.505686		96	R123-SPD-4-31	2.398	12.0476	0.487177
97	80017-97	2.4	0.048372	0.464994		97	R123-SPD-1-40	2.416	5.73755	0.489426		97	R123-SPD-2-47	2.381	8.21699	0.520869		97	R123-SPD-3-34	2.346	5.16882	0.528621		97	R123-SPD-4-32	2.407	12.067	0.487173
98	80017-98	2.407	-0.0161218	0.484429		98	R123-SPD-1-41	2.392	5.62807	0.500906		98	R123-SPD-2-48	2.364	8.66779	0.517004		98	R123-SPD-3-35	2.363	5.29753	0.545432		98	R123-SPD-4-33	2.37	12.1379	0.452133
99	80017-99	2.427	0.170905	0.476476		99	R123-SPD-1-42	2.367	5.71823	0.512824		99	R123-SPD-2-49	2.365	8.15898	0.543175		99	R123-SPD-3-36	2.338	5.25248	0.571228		99	R123-SPD-4-34	2.416	12.3163	0.499888
100	80017-100	2.442	-0.151466	0.52146		100	R123-SPD-1-43	2.304	5.96932	0.492496		100	R123-SPD-2-50	2.324	8.69992	0.522195		100	R123-SPD-3-37	2.359	5.43903	0.549646		100	R123-SPD-4-35	2.408	12.3098	0.45546
101	80017-101	2.415	0.067674	0.527599		101	R123-SPD-1-44	2.417	5.85983	0.492513		101	R123-SPD-2-51	2.375	8.37149	0.552992		101	R123-SPD-3-38	2.325	5.29744	0.571463		101	R123-SPD-4-36	2.306	12.168	0.480402
102	80017-102	2.429	0.141787	0.490002		102	R123-SPD-1-45	2.372	6.05305	0.485344		102	R123-SPD-2-52	2.385	8.24584	0.556534		102	R123-SPD-3-39	2.346	5.32962	0.536194		102	R123-SPD-4-37	2.16	12.0682	0.4641
103	80017-103	2.391	-0.0773345	0.461598		103	R123-SPD-1-46	2.38	5.70225	0.532436		103	R123-SPD-2-53	2.38	8.32956	0.553205		103	R123-SPD-3-40	2.348	5.43534	0.630558		103	R123-SPD-4-38	2.4	12.4035	0.479732
104	80017-104	2.447	-0.206202	0.496276		104	R123-SPD-1-47	2.412	5.49618	0.547259		104	R123-SPD-2-54	2.34	8.56782	0.52594		104	R123-SPD-3-41	2.354	5.06595	0.578162		104	R123-SPD-4-39	2.423	12.5711	0.445716
105	80017-105	2.388	-0.112769	0.589008		105	R123-SPD-1-48	2.39	5.62497	0.554929		105	R123-SPD-2-55	2.327	8.67074	0.455252		105	R123-SPD-3-42	2.362	5.41346	0.583703		105	R123-SPD-4-40	2.383	12.1864	0.45925
106	80017-106	2.39	0.0386735	0.578972		106	R123-SPD-1-49	2.419	5.54143	0.556156		106	R123-SPD-2-56	2.347	8.2522	0.471138		106	R123-SPD-3-43	2.352	5.14961	0.583733		106	R123-SPD-4-41	2.351	12.0639	0.452409
107	80017-107	2.418	0.21278	0.555417		107	R123-SPD-1-50	2.383	5.59938	0.54222		107	R123-SPD-2-57	2.376	8.35523	0.488571		107	R123-SPD-3-44	2.37	4.69367	0.502209		107	R123-SPD-4-42	2.354	12.1412	0.513703
108	80017-108	2.374	-0.0677033	0.517621		108	R123-SPD-1-51	2.376	5.6702	0.54221		108	R123-SPD-2-58	2.398	8.42609	0.489676		108	R123-SPD-3-45	2.337	4.91238	0.46932		108	R123-SPD-4-43	2.379	12.3672	0.50016
109	80017-109	2.376	-0.125737	0.558025		109	R123-SPD-1-52	2.361	5.48686	0.502689		109	R123-SPD-2-59	2.372	8.52268	0.461365		109	R123-SPD-3-46	2.345	4.44924	0.473325		109	R123-SPD-4-44	2.436	12.277	0.530688
110	80017-110	2.362	-0.0644733	0.516685		110	R123-SPD-1-53	2.407	5.52548	0.514329		110	R123-SPD-2-60	2.367	8.43897	0.461379		110	R123-SPD-3-47	2.334	4.77093	0.461668		110	R123-SPD-4-45	2.386	12.3737	0.488178
111	80017-111	2.408	0.273991	0.488671		111	R123-SPD-1-54	2.393	5.69931	0.477428		111	R124-SPD-2-01	2.37	8.54442	0.520158		111	R123-SPD-3-48	2.326	4.85455	0.446652		111	R123-SPD-4-46	2.397	12.3284	0.514312
112	80017-112	2.423	-0.0998933	0.440244		112	R123-SPD-1-55	2.424	5.54814	0.444506		112	R124-SPD-2-02	2.384	8.29292	0.485704		112	R123-SPD-3-49	2.377	4.60369	0.473562		112	R123-SPD-4-47	2.062	11.9416	0.549661
113	80017-113	2.412	0.238499	0.45808		113	R123-SPD-1-56	2.389	5.58677	0.508953		113	R124-SPD-2-03	2.385	8.46703	0.492964		113	R123-SPD-3-50	2.334	4.77074	0.520667		113	R123-SPD-4-48	2.382	12.135	0.599423
114	80017-114	2.411	-0.302892	0.470009		114	R123-SPD-1-57	2.399	5.40008	0.465354		114	R124-SPD-2-04	2.41	8.66722	0.458432		114	R123-SPD-3-51	2.369	5.16957	0.465135		114	R123-SPD-4-49	2.398	12.1155	0.455879
115	80017-115	2.39	0.112794	0.453595		115	R123-SPD-1-58	2.39	5.77967	0.443203		115	R124-SPD-2-05	2.429	9.04775	0.425908		115	R123-SPD-3-52	2.351	4.64852	0.476204		115	R123-SPD-4-50	2.36	11.7609	0.452085
116	80017-116	2.42	0.164355	0.461214		116	R123-SPD-1-59	2.386	5.63158	0.505643		116	R124-SPD-2-06	2.393	8.62852	0.443361		116	R123-SPD-3-53	2.357	5.23021	0.529244		116	R123-SPD-4-51	2.377	11.9543	0.475995
117	80017-117	2.423	-0.232002	0.482562		117	R123-SPD-1-60	2.381	5.52212	0.470935		117	R124-SPD-2-07	2.42	8.21593	0.607301		117	R123-SPD-3-54	2.341	5.2109	0.525978		117	R123-SPD-4-52	2.369	12.3803	0.390655
118	80017-118	2.698	0.122465	0.525946		118	R124-SPD-1-01	2.386	5.84575	0.418595		118	R124-SPD-2-08	2.378	8.4933	0.600523		118	R123-SPD-3-55	2.315	5.51977	0.525937		118	R123-SPD-4-53	2.374	12.4125	0.422212
119	80017-119	2.688	0.0451176	0.53639		119	R124-SPD-1-02	2.388	5.75548	0.441287		119	R124-SPD-2-09	2.397	8.57716	0.564631		119	R123-SPD-3-56	2.35	5.21737	0.547258		119	R123-SPD-4-54	2.387	12.2062	0.439433
120	80017-120	2.693	0.0483473	0.540452		120	R124-SPD-1-03	2.393	6.02629	0.449286		120	R124-SPD-2-10	2.344	8.72861	0.631889		120	R123-SPD-3-57	2.313	5.52623	0.538153		120	R123-SPD-4-55	2.315	11.9543	0.420904
121	80017-121	2.645	-0.0838109	0.547864		121	R124-SPD-1-04	2.386	5.9006	0.456987		121	R124-SPD-2-11	2.357	8.41901	0.63491		121	R123-SPD-3-58	2.324	5.15946	0.60386		121	R123-SPD-4-56	2.38	11.7932	0.458421
122	80017-122	2.641	0.138488	0.470235		122	R124-SPD-1-05	2.406	5.7523	0.434579		122	R124-SPD-2-12	2.392	8.53511	0.615155		122	R124-SPD-3-01	2.32	5.3561	0.469615		122	R123-SPD-4-57	2.389	12.0382	0.462789
123	80017-123	2.625	-0.0032206	0.499316		123	R124-SPD-1-06	2.385	5.68138	0.473153		123	R124-SPD-2-13	2.382	8.47354	0.549058		123	R124-SPD-3-02	2.327	5.2594	0.477204		123	R123-SPD-4-58	2.393	12.0738	0.425482
124	80017-124	2.647	-0.0450921	0.492162		124	R124-SPD-1-07	2.4	5.81998	0.533877		124	R124-SPD-2-14	2.367	8.35101	0.542541		124	R124-SPD-3-03	2.368	5.09824	0.485033		124	R123-SPD-4-59	2.416	11.9835	0.433734
125	80017-125	2.629	0.0869775	0.508591		125	R124-SPD-1-08	2.408	5.18667	0.46964		125	R124-SPD-2-15	2.378	8.20269	0.562826		125	R124-SPD-3-04	2.377	5.1756	0.473402		125	R123-SPD-4-60	2.378	12.2414	0.450797
126	80017-126	2.587	-0.144959	0.488007		126	R124-SPD-1-09	2.395	5.16747	0.456689		126	R124-SPD-2-16	2.387	8.10556	0.51857		126	R124-SPD-3-05	2.363	5.04023	0.477241		126	R123-SPD-4-61	2.394	12.3454	0.470296
127	80017-127	2.547	-0.0966358	0.543186		127	R124-SPD-1-10	2.393	5.81998	0.515816		127	R124-SPD-2-17	2.38	8.29896	0.508494		127	R124-SPD-3-06	2.355	4.84039	0.489063		127	R123-SPD-4-62	2.393	12.3518	0.407309
128	80017-128	2.577	-0.0225438	0.556369		128	R124-SPD-1-11	2.379	5.81998	0.508986		128	R124-SPD-2-18	2.383	8.09266	0.515163		128	R124-SPD-3-07	2.358	5.5524	0.524359		128	R123-SPD-4-63	2.405	12.0036	0.4837
129	80017-129	2.55	0.370388	0.549434		129	R124-SPD-1-12	2.386	5.733	0.570387		129	R124-SPD-2-19	2.363	8.14401	0.517465		129	R124-SPD-3-08	2.353	5.18488	0.517371		129	R124-SPD-4-01	2.319	12.1018	0.4984
130	80017-130	2.516	-0.212536	0.494942		130	R124-SPD-1-13	2.381	6.01024	0.559837		130	R124-SPD-2-20	2.387	7.82817	0.495916		130	R124-SPD-3-09	2.347	5.52016	0.485733		130	R124-SPD-4-02	2.345	12.0631	0.498407
131	80017-131	2.528	-0.122379	0.510806		131	R124-SPD-1-14	2.395	5.78458	0.534283		131	R124-SPD-2-21	2.364	7.91841	0.499361		131	R124-SPD-3-10	2.347	5.49762	0.559527		131	R124-SPD-4-03	2.377	12.1018	0.513677
132	80017-132	2.526	0.057965	0.489855		132	R124-SPD-1-15	2.396	5.88118	0.559625		132	R124-SPD-2-22	2.36	7.77338	0.48095		132	R124-SPD-3-11	2.366	5.50407	0.548805		132	R124-SPD-4-04	2.359	12.3333	0.488296
133	80017-133	2.536	0.199659	0.512195		133	R124-SPD-1-16	2.403	5.70708	0.521728		133	R124-SPD-2-23	2.366	8.05699	0.445983		133	R124-SPD-3-12	2.329	5.45893	0.574533		133	R124-SPD-4-05	2.113	12.8098	0.514969
134	80017-134	2.518	-0.186755	0.477888		134	R124-SPD-1-17	2.363	5.91342	0.570349		134	R124-SPD-2-24	2.36	8.08921	0.473959		134	R124-SPD-3-13	2.365	5.04686	0.451794		134	R124-SPD-4-06	2.102	12.9768	0.438223
135	80017-135	2.539	-0.0676187	0.539182		135	R124-SPD-1-18	2.399	5.87786	0.456195		135	R124-SPD-2-25	2.346	8.12158	0.476969		135	R124-SPD-3-14	2.362	5.21445	0.477216		135	R124-SPD-4-07	2.353	11.8348	0.465682
136	80017-136	2.575	0.122351	0.531842		136	R124-SPD-1-19	2.39	6.07132	0.484523		136	R124-SPD-2-26	2.392	7.94108	0.501414		136	R124-SPD-3-15	2.354	5.05331	0.43558		136	R124-SPD-4-08	2.288	11.8053	0.476092
137	80017-137	2.539	-0.112665	0.538286		137	R124-SPD-1-20	2.388	6.08422	0.494352		137	R124-SPD-2-27	2.4	8.05067	0.493052		137	R124-SPD-3-16	2.358	4.85049	0.456986		137	R124-SPD-4-09	2.34	11.7216	0.465498
138	80017-138	2.535	0.131982	0.483743		138	R124-SPD-1-21	2.428	5.84556	0.496657		138	R124-SPD-2-28	2.391	7.90249	0.49664		138	R124-SPD-3-17	2.359	4.88271	0.449063		138	R124-SPD-4-10	2.342	12.4106	0.476916
139	80017-139	2.577	0.160964	0.454058		139	R124-SPD-1-22	2.276	6.25831	0.493015		139	R124-SPD-2-29	2.386	7.8638	0.487545		139	R124-SPD-3-18	2.34	5.44343	0.456881		139	R124-SPD-4-11	2.362	11.9462	0.410869
140	80017-140	2.534	-0.276837	0.523313		140	R124-SPD-1-23	2.352	5.85201	0.515394		140	R124-SPD-2-30	2.389	8.30219	0.461228		140	R124-SPD-3-19	2.344	5.08238	0.485489		140	R124-SPD-4-12	2.265	11.7852	0.425815
141	80017-141	2.567	0.167432	0.526632		141	R124-SPD-1-24	2.381	6.01961	0.536282		141	R124-SPD-2-31	2.402	8.44731	0.457642		141	R124-SPD-3-20	2.344	5.0566	0.47547		141	R124-SPD-4-13	2.334	11.65	0.414541
142	80017-142	2.561	-0.157743	0.548998		142	R124-SPD-1-25	2.358	6.00671	0.570912		142	R124-SPD-2-32	2.403	8.34416	0.484448		142	R124-SPD-3-21	2.329	4.97925	0.507181		142	R124-SPD-4-14	2.32	12.3591	0.488291
143	80017-143	2.563	-0.344473	0.507308		143	R124-SPD-1-26	2.401	6.01961	0.57091		143	R124-SPD-2-33	2.359	8.18298	0.476541		143	R124-SPD-3-22	2.393	4.8504	0.482612		143	R124-SPD-4-15	2.36	12.2979	0.432397
144	80017-144	2.541	0.083724	0.543649		144	R124-SPD-1-27	2.414	5.77468	0.540058		144	R124-SPD-2-34	2.375	8.07341	0.52045		144	R124-SPD-3-23	2.359	5.14688	0.46429		144	R124-SPD-4-16	2.389	12.2335	0.428445
145	80017-145	2.545	-0.128776	0.583991		145	R124-SPD-1-28	2.441	5.13809	0.485321		145	R124-SPD-2-35	2.382	8.06052	0.488898		145	R124-SPD-3-24	2.352	5.00508	0.482586		145	R124-SPD-4-17	2.351	12.0594	0.424569
146	80017-146	2.519	0.00643791	0.603996		146	R124-SPD-1-29	2.428	5.05785	0.433708		146	R124-SPD-2-36	2.408	8.17657	0.454601		146	R124-SPD-3-25	2.348	5.05669	0.437295		146	R124-SPD-4-18	2.38	12.0749	0.488455
147	80017-147	2.471	0.193122	0.547156		147	R124-SPD-1-30	2.381	6.11647	0.511473		147	R124-SPD-2-37	2.364	8.36689	0.4849		147	R124-SPD-3-26	2.351	5.01802	0.447898		147	R124-SPD-4-19	2.364	12.2103	0.471647
148	80017-148	2.483	-0.0901092	0.468846		148	R124-SPD-1-31	2.39	5.90366	0.514872		148	R124-SPD-2-38	2.371	8.13477	0.477183		148	R124-SPD-3-27	2.34	5.10825	0.47477		148	R124-SPD-4-20	2.376	11.9074	0.506022
149	80017-149	2.548	0.186696	0.492013		149	R124-SPD-1-32	2.349	5.5623	0.488763		149	R124-SPD-2-39	2.377	8.47651	0.435719		149	R124-SPD-3-28	2.359	5.37234	0.514947		149	R124-SPD-4-21	2.314	11.9324	0.46193
150	80017-150	2.511	-0.263913	0.532504		150	R124-SPD-1-33	2.411	5.65901	0.427632		150	R124-SPD-2-40	2.396	8.30886	0.49189		150	R124-SPD-3-29	2.357	5.13384	0.507649		150	R124-SPD-4-22	2.39	12.1451	0.472326
151	80017-151	2.519	0.186775	0.552876		151	R124-SPD-1-34	2.401	5.62677	0.390991		151	R124-SPD-2-41	2.4	8.22504	0.48052		151	R124-SPD-3-30	2.337	5.1274	0.477559		151	R124-SPD-4-23	2.364	12.1386	0.523294
152	80017-152	2.516	-0.202827	0.563189		152	R124-SPD-1-35	2.368	5.65908	0.439823		152	R124-SPD-2-42	2.434	8.12188	0.503794		152	R124-SPD-3-31	2.382	4.88235	0.477607		152	R124-SPD-4-24	2.335	11.871	0.473031
153	80017-153	2.514	0.199637	0.540309		153	R124-SPD-1-36	2.406	5.42056	0.455868		153	R124-SPD-2-43	2.364	8.09601	0.485389		153	R124-SPD-3-32	2.357	4.99194	0.538321		153	R124-SPD-4-25	2.38	12.0063	0.469036
154	80017-154	2.529	-0.122336	0.481201		154	R124-SPD-1-37	2.397	5.5237	0.464182		154	R124-SPD-2-44	2.405	8.22496	0.491656		154	R124-SPD-3-33	2.349	5.0564	0.487057		154	R124-SPD-4-26	2.353	11.8452	0.477059
155	80017-155	2.555	0.00321714	0.463358		155	R124-SPD-1-38	2.392	5.39465	0.492335		155	R124-SPD-2-45	2.378	8.1347	0.508459		155	R124-SPD-3-34	2.315	5.15308	0.44815		155	R124-SPD-4-27	2.453	11.8449	0.698694
156	80017-156	2.572	0.0418228	0.506057		156	R124-SPD-1-39	2.377	5.91685	0.480814		156	R124-SPD-2-46	2.375	8.24738	0.495143		156	R124-SPD-3-35	2.346	5.12085	0.459594		156	R124-SPD-4-28	2.355	11.8578	0.480868
157	80017-157	2.475	0.128703	0.514973		157	R124-SPD-1-40	2.377	5.67831	0.488418		157	R124-SPD-2-47	2.38	8.05398	0.488088		157	R124-SPD-3-36	2.359	5.30779	0.471516		157	R124-SPD-4-29	2.383	11.8123	0.480567
158	80017-158	2.451	-0.141577	0.518597		158	R124-SPD-1-41	2.397	5.63298	0.412668		158	R124-SPD-2-48	2.367	8.15712	0.484621		158	R124-SPD-3-37	2.364	5.2531	0.531383		158	R124-SPD-4-30	2.376	12.1321	0.447447
159	80017-159	2.47	0.0804611	0.510017		159	R124-SPD-1-42	2.428	5.2927	0.477333		159	R124-SPD-2-49	2.387	7.95066	0.447222		159	R124-SPD-3-38	2.367	5.38201	0.574953		159	R124-SPD-4-31	2.356	12.1192	0.457663
160	80017-160	2.464	-0.222046	0.570609		160	R124-SPD-1-43	2.384	5.59429	0.531715		160	R124-SPD-2-50	2.367	8.02156	0.435802		160	R124-SPD-3-39	2.378	5.19508	0.547046		160	R124-SPD-4-32	2.314	11.8099	0.50388
161	80017-161	2.461	0.38952	0.625277		161	R124-SPD-1-44	2.395	5.55561	0.429748		161	R124-SPD-2-51	2.397	8.01511	0.459149		161	R124-SPD-3-40	2.33	5.34982	0.605911		161	R124-SPD-4-33	2.367	12.0581	0.50618
162	80017-162	2.485	-0.366776	0.515623		162	R124-SPD-1-45	2.401	5.61993	0.496775		162	R124-SPD-2-52	2.385	8.37629	0.421503		162	R124-SPD-3-41	2.327	5.03399	0.594279		162	R124-SPD-4-34	2.27	11.8003	0.510235
163	80017-163	2.482	0.419568	0.582363		163	R124-SPD-1-46	2.388	5.83274	0.507084		163	R124-SPD-2-53	2.365	7.82832	0.52087		163	R124-SPD-3-42	2.344	5.24025	0.602925		163	R124-SPD-4-35	2.332	12.0903	0.486933
164	80017-164	2.502	-0.234924	0.641216		164	R124-SPD-1-47	2.377	5.85853	0.525444		164	R124-SPD-2-54	2.368	8.14421	0.439585		164	R124-SPD-3-43	2.349	5.4303	0.528271		164	R124-SPD-4-36	2.357	12.154	0.509183
165	80017-165	2.488	-0.109344	0.460879		165	R124-SPD-1-48	2.385	5.95858	0.516171		165	R124-SPD-2-55	2.366	8.26383	0.421018		165	R124-SPD-3-44	2.332	5.1918	0.542634		165	R124-SPD-4-37	2.326	12.0444	0.492474
166	80017-166	2.489	0.231598	0.460922		166	R124-SPD-1-49	2.362	5.85541	0.519686		166	R124-SPD-2-56	2.393	8.60559	0.469024		166	R124-SPD-3-45	2.356	5.21758	0.502416		166	R124-SPD-4-38	2.373	11.7352	0.4474
167	80017-167	2.513	-0.0353849	0.528573		167	R124-SPD-1-50	2.383	5.76514	0.496447		167	R124-SPD-2-57	2.335	8.5669	0.469032		167	R124-SPD-3-46	2.348	5.30468	0.48821		167	R124-SPD-4-39	2.385	11.8708	0.450622
168	80017-168	2.487	-0.270216	0.552989		168	R124-SPD-1-51	2.366	5.85863	0.504004		168	R124-SPD-2-58	2.377	8.22824	0.470637		168	R124-SPD-3-47	2.275	5.35625	0.54576		168	R124-SPD-4-40	2.086	12.6871	0.506619
169	80017-169	2.462	0.0901853	0.620884		169	R124-SPD-1-52	2.358	5.8135	0.482688		169	R124-SPD-2-59	2.387	8.47325	0.443618		169	R124-SPD-3-48	2.309	5.3498	0.49972		169	R124-SPD-4-41	2.112	12.6736	0.475845
170	80017-170	2.438	-0.02255	0.543117		170	R124-SPD-1-53	2.364	5.92956	0.474482		170	R124-SPD-2-60	2.351	8.51194	0.451024		170	R124-SPD-3-49	2.356	5.20484	0.46478		170	R124-SPD-4-42	2.356	12.1801	0.493221
171	80017-171	2.434	0.0676719	0.595924		171	R124-SPD-1-54	2.387	5.81361	0.45855		171	R124-SPD-2-61	2.25	8.63868	0.563889		171	R124-SPD-3-50	2.309	5.07594	0.503174		171	R124-SPD-4-43	2.351	12.0705	0.462866
172	80017-172	2.456	-0.215924	0.567402		172	R124-SPD-1-55	2.381	5.71046	0.486047		172	R124-SPD-2-62	2.294	8.7224	0.580663		172	R124-SPD-3-51	2.36	5.15328	0.477876		172	R124-SPD-4-44	2.067	12.6923	0.491208
173	80017-173	2.435	-0.0805742	0.544133		173	R124-SPD-1-56	2.37	5.67177	0.434063		173	R124-SPD-2-63	2.288	8.32958	0.542747		173	R124-SPD-3-52	2.33	5.4174	0.534001		173	R124-SPD-4-45	2.002	12.57	0.491224
174	80017-174	2.464	0.199835	0.477604		174	R124-SPD-1-57	2.391	5.59446	0.434905		174	R124-SPD-2-64	2.289	8.36179	0.595528		174	R124-SPD-3-53	2.33	5.3336	0.534019		174	R124-SPD-4-46	2.362	11.751	0.480979
175	80017-175	2.458	-0.0128921	0.492021		175	R124-SPD-1-58	2.396	5.87169	0.46608		175	R124-SPD-2-65	2.277	8.63869	0.572446		175	R124-SPD-3-54	2.304	5.38517	0.510547		175	R124-SPD-4-47	2.362	11.751	0.465695
176	80017-176	2.508	-0.12248	0.475517		176	R124-SPD-1-59	2.378	5.72985	0.455113		176	R124-SPD-2-66	2.345	8.64513	0.563386		176	R124-SPD-3-55	2.345	5.23373	0.444402		176	R124-SPD-4-48	2.319	11.8182	0.47609
177	80017-177	2.446	0.070916	0.483853		177	R124-SPD-1-60	2.378	5.90684	0.538937		177	R124-SPD-2-67	2.29	8.61322	0.577322		177	R124-SPD-3-56	2.353	5.31108	0.447432		177	R124-SPD-4-49	2.391	12.1639	0.461554
178	80017-178	2.44	0.164419	0.452321		178	R124-SPD-1-61	2.37	6.23574	0.524605		178	R124-SPD-2-68	2.312	8.70339	0.554556		178	R124-SPD-3-57	2.345	5.34975	0.504852		178	R124-SPD-4-50	2.353	12.0544	0.499201
179	80017-179	2.447	0.125733	0.445993		179	R124-SPD-1-62	2.351	6.13256	0.564875		179	R124-SPD-2-69	2.308	8.52949	0.557664		179	R124-SPD-3-58	2.333	5.0629	0.438085		179	R124-SPD-4-51	2.331	12.4023	0.483421
180	80017-180	2.493	0.141844	0.527578		180	R124-SPD-1-63	2.353	6.30983	0.574784		180	R124-SPD-2-70	2.273	8.51953	0.505321		180	R124-SPD-3-59	2.337	5.29496	0.485581		180	R124-SPD-4-52	2.37	12.2826	0.498064
181	80017-181	2.447	-0.225624	0.520422		181	R124-SPD-1-64	2.359	6.30983	0.550502		181	R124-SPD-2-71	2.239	8.57105	0.511977		181	R124-SPD-3-60	2.34	5.20471	0.485598		181	R124-SPD-4-53	2.351	12.3471	0.494455
182	80017-182	2.468	0.212773	0.511617		182	R124-SPD-1-65	2.371	6.47108	0.581387		182	R124-SPD-2-72	2.249	8.74492	0.522378		182	R124-SPD-3-61	2.361	5.16166	0.502589		182	R124-SPD-4-54	2.267	12.0249	0.487476
183	80017-183	2.46	-0.103149	0.426958		183	R124-SPD-1-66	2.403	5.38357	0.49662		183	R124-SPD-2-73	2.244	8.35845	0.506613		183	R124-SPD-3-62	2.364	4.88482	0.52193		183	R124-SPD-4-55	2.353	12.034	0.491193
184	80017-184	2.45	-0.0515756	0.402307		184	R124-SPD-1-67	2.441	5.41576	0.469184		184	R124-SPD-2-74	2.323	8.55807	0.510199		184	R124-SPD-3-63	2.383	4.77537	0.491727		184	R124-SPD-4-56	2.333	11.8794	0.51282
185	80017-185	2.443	0.164412	0.398732		185	R124-SPD-1-68	2.364	5.95316	0.458081		185	R124-SPD-2-75	2.285	8.68685	0.499498		185	R124-SPD-3-64	2.402	4.78171	0.485879		185	R124-SPD-4-57	2.325	12.0147	0.528262
186	80017-186	2.395	-0.0515793	0.421859		186	R124-SPD-1-69	2.426	5.41221	0.519687		186	R124-SPD-2-76	2.232	8.62595	0.595332		186	R124-SPD-3-65	2.408	4.65938	0.485901		186	R124-SPD-4-58	2.322	12.1928	0.518309
187	80017-187	2.486	-0.103163	0.410954		187	R124-SPD-1-70	2.392	5.88882	0.50333		187	R124-SPD-2-77	2.256	8.47139	0.546719		187	R124-SPD-3-66	2.38	4.74952	0.502067		187	R124-SPD-4-59	2.358	12.0317	0.465696
188	80017-188	2.46	0.067705	0.448679		188	R124-SPD-1-71	2.403	5.12921	0.48614		188	R124-SPD-2-78	2.224	8.69035	0.524927		188	R124-SPD-3-67	2.393	4.82362	0.498669		188	R124-SPD-4-60	2.352	11.9673	0.473234
189	80017-189	2.451	-0.0032239	0.489442		189	R124-SPD-1-72	2.403	5.0777	0.45744		189	R124-SPD-2-79	2.247	8.61607	0.501357		189	R124-SPD-3-68	2.361	5.04253	0.491405		189	R124-SPD-4-61	2.372	12.263	0.397094
190	80017-190	2.464	-0.074146	0.552616		190	R124-SPD-1-73	2.407	5.43377	0.499353		190	R124-SPD-2-80	2.226	8.38426	0.493092		190	R124-SPD-3-69	2.373	5.03609	0.529709		190	R124-SPD-4-62	2.348	11.9473	0.377793
191	80017-191	2.468	0.2386	0.573483		191	R124-SPD-1-74	2.403	5.21274	0.493937		191	R124-SPD-2-81	2.189	8.571	0.469352		191	R124-SPD-3-70	2.39	4.98123	0.530273		191	R124-SPD-4-63	2.369	11.8829	0.47826
192	80017-192	2.451	-0.254685	0.542302		192	R124-SPD-1-75	2.415	5.3351	0.48228		192	R124-SPD-2-82	2.169	8.63835	0.39443		192	R124-SPD-3-71	2.366	5.00699	0.551052		192	R124-SPD-4-64	2.108	12.7326	0.523507
193	80017-193	2.448	0.21284	0.522674		193	R124-SPD-1-76	2.424	5.50215	0.471163		193	R124-SPD-2-83	2.263	8.39369	0.38706		193	R124-SPD-3-72	2.377	5.10357	0.541518		193	R124-SPD-4-65	2.106	12.6034	0.450793
194	80017-194	2.447	-0.174121	0.538976		194	R124-SPD-1-77	2.306	5.71472	0.535128		194	R124-SPD-2-84	2.273	8.41944	0.4353		194	R124-SPD-3-73	2.364	5.06494	0.560552		194	R124-SPD-4-66	2.104	12.5507	0.491227
195	80017-195	2.444	-0.0644907	0.535761		195	R124-SPD-1-78	2.388	5.45705	0.539249		195	R124-SPD-2-85	2.222	8.61267	0.424652		195	R124-SPD-3-74	2.399	5.1422	0.557227		195	R124-SPD-4-67	1.947	12.467	0.537043
196	80017-196	2.395	-0.109606	0.483452		196	R124-SPD-1-79	2.383	5.74045	0.477382		196	R124-SPD-2-86	2.27	8.30362	0.441127		196	R124-SPD-3-75	2.408	5.34174	0.562856		196	R124-SPD-4-68	2.07	12.5828	0.524372
197	80017-197	2.412	0.373969	0.439214		197	R124-SPD-1-80	2.405	5.5343	0.484678		197	R124-SPD-2-87	2.226	8.59979	0.436882		197	R124-SPD-3-76	2.387	5.19364	0.575447		197	R124-SPD-4-69	2.073	12.7501	0.547086
198	80017-198	2.433	-0.232051	0.443082		198	R124-SPD-1-81	2.4	5.54074	0.503831		198	R124-SPD-2-88	2.162	8.36791	0.458575		198	R124-SPD-3-77	2.389	5.07129	0.621998		198	R124-SPD-4-70	2.104	12.5279	0.502019
199	80017-199	2.425	0.309524	0.45573		199	R124-SPD-1-82	2.421	5.24164	0.52732		199	R124-SPD-2-89	2.224	8.54174	0.494819		199	R124-SPD-3-78	2.381	5.16469	0.51031		199	R124-SPD-4-71	2.09	12.4121	0.540345
200	80017-200	2.443	-0.348149	0.502973		200	R124-SPD-1-83	2.416	5.18711	0.537667		200	R124-SPD-2-90	2.202	8.56105	0.503423		200	R124-SPD-3-79	2.4	5.11318	0.537634		200	R124-SPD-4-72	2.065	12.676	0.537
201	80017-201	2.446	0.125752	0.492867			Average		5.69151				Average		8.33328			201	R124-SPD-3-80	2.397	5.11318	0.513527		201	R124-SPD-4-73	1.957	11.9775	0.506864
202	80017-202	2.428	-0.0225681	0.512204			2SD		0.583643				2SD		0.504978			202	R124-SPD-3-81	2.397	5.29347	0.538131		202	R124-SPD-4-74	2.073	12.7497	0.513345
203	80017-203	2.462	-0.0902643	0.450644														203	R124-SPD-3-82	2.379	5.24196	0.517812		203	R124-SPD-4-75	2.091	12.6727	0.569955
204	80017-204	2.474	0.154746	0.465512														204	R124-SPD-3-83	2.406	5.07454	0.545387		204	R124-SPD-4-76	2.11	12.6148	0.541788
205	80017-205	2.425	0.203136	0.541447														205	R124-SPD-3-84	2.407	5.45114	0.562888		205	R124-SPD-4-77	2.083	12.7297	0.495739
206	80017-206	2.441	-0.383674	0.567886														206	R124-SPD-3-85	2.365	5.47689	0.566382		206	R124-SPD-4-78	2.085	12.5817	0.536482
207	80017-207	2.427	0.0548208	0.558713														207	R124-SPD-3-86	2.399	5.14204	0.530985		207	R124-SPD-4-79	2.077	12.4981	0.526208
208	80017-208	2.446	0.296707	0.47848														208	R124-SPD-3-87	2.375	5.20661	0.525877		208	R124-SPD-4-80	2.086	12.1856	0.4947
209	80017-209	2.443	-0.30956	0.575491														209	R124-SPD-3-88	2.357	5.21949	0.461862		209	R124-SPD-4-81	2.069	12.739	0.448933
210	80017-210	2.386	0.0935348	0.617682														210	R124-SPD-3-89	2.371	5.33539	0.507542		210	R124-SPD-4-82	2.075	12.6296	0.486947
211	80017-211	2.385	-0.20314	0.647205															Average		5.05972				Average		12.2884
212	80017-212	2.396	0.0580327	0.555627															2SD		0.538781				2SD		0.614744
213	80017-213	2.397	0.0838045	0.528919
214	80017-214	2.44	0.099912	0.499116
215	80017-215	2.42	0.012892	0.480686
216	80017-216	2.447	-0.0386787	0.440536
217	80017-217	2.442	-0.00322349	0.461085
218	80017-218	2.435	-0.0064472	0.457436
219	80017-219	2.472	0.0612542	0.488706
220	80017-220	2.46	-0.14829	0.469404
221	80017-221	2.463	0.0902719	0.511818
222	80017-222	2.481	-0.14505	0.491381
223	80017-223	2.477	0.0966987	0.484354
224	80017-224	2.452	0.2063	0.431861
225	80017-225	2.495	-0.0870375	0.431924
226	80017-226	2.487	-0.267558	0.439768
227	80017-227	2.44	0.145069	0.4546
228	80017-228	2.445	0.0709124	0.468953
229	80017-229	2.401	0.157966	0.51326
230	80017-230	2.451	0.103153	0.51328
231	80017-231	2.457	0.106354	0.472686
232	80017-232	2.46	0.0709	0.468478
233	80017-233	2.474	-0.167566	0.478082
234	80017-234	2.471	0.167589	0.478096
235	80017-235	2.438	-0.0322269	0.486373
236	80017-236	2.443	-0.0257837	0.503406
237	80017-237	2.466	-0.0193384	0.483204
238	80017-238	2.45	-0.0483439	0.54645
239	80017-239	2.475	0.083798	0.585602
240	80017-240	2.457	0.00322293	0.602393
241	80017-241	2.461	-0.112797	0.527648
242	80017-242	2.449	0.119251	0.491314
243	80017-243	2.423	0.0193375	0.502484
244	80017-244	2.43	-0.13858	0.488402
245	80017-245	2.425	0.164385	0.480877
246	80017-246	2.428	-0.193358	0.480839
247	80017-247	2.442	0.122472	0.47741
248	80017-248	2.459	-0.00966778	0.44941
249	80017-249	2.448	-0.125667	0.440974
250	80017-250	2.44	0.10311	0.45223
251	80017-251	2.433	-0.0161084	0.465579
252	80017-252	2.429	0.0193294	0.47757
253	80017-253	2.459	-0.0450976	0.473915
254	80017-254	2.465	0.280306	0.488114
255	80017-255	2.443	-0.415519	0.476352
256	80017-256	2.463	0.244867	0.469349
257	80017-257	2.456	-0.0322136	0.451038
258	80017-258	2.464	-0.151391	0.455088
259	80017-259	2.413	0.17717	0.462304
260	80017-260	2.403	0.11919	0.483913
261	80017-261	2.372	-0.409027	0.487783
262	80017-262	2.384	0.376929	0.502216
263	80017-263	2.411	-0.0740829	0.481431
264	80017-264	2.417	-0.238341	0.422946
265	80017-265	2.436	0.154603	0.418496
266	80017-266	2.441	0.202931	0.465109
267	80017-267	2.433	-0.122369	0.47281
268	80017-268	2.424	-0.125759	0.452872
269	80017-269	2.463	-0.186767	0.470543
270	80017-270	2.43	-0.0515334	0.511177
271	80017-271	2.435	-0.254391	0.523468
272	80017-272	2.42	0.396129	0.562507
273	80017-273	2.45	-0.251109	0.594991
274	80017-274	2.439	0.238293	0.602528
275	80017-275	2.425	-0.0772788	0.602547
276	80017-276	2.42	-0.170635	0.521323
277	80017-277	2.42	-0.112688	0.493012
278	80017-278	2.377	0.0869277	0.444069
279	80017-279	2.367	-0.10946	0.397997
280	80017-280	2.385	-0.218882	0.436698
281	80017-281	2.45	-0.296203	0.474052
282	80017-282	2.423	-0.263941	0.477296
283	80017-283	2.448	0.189953	0.505393
284	80017-284	2.438	-0.0933554	0.516936
285	80017-285	2.444	0.0257556	0.580854
286	80017-286	2.427	0.0193171	0.588244
287	80017-287	2.409	-0.080485	0.571622
288	80017-288	2.416	0.0965897	0.563601
289	80017-289	2.448	-0.035415	0.552122
290	80017-290	2.41	-0.128773	0.548831
291	80017-291	2.401	0.0772618	0.503395
292	80017-292	2.465	0.00643753	0.475767
293	80017-293	2.404	-0.038621	0.483324
294	80017-294	2.385	0.0257453	0.501985
295	80017-295	2.42	0.077233	0.544206
296	80017-296	2.416	-0.0933133	0.55114
297	80017-297	2.394	0.0804466	0.558304
298	80017-298	2.371	0	0.570513
299	80017-299	2.33	-0.199467	0.54793
300	80017-300	2.372	0.292805	0.537036
	Average		0.00283555
	2SD		0.357058

## Sheet: Table S4
Table S4 H-index calculations of the four spodumene reference materials
	Sample	δ7Li (‰)	Measurement uncertainty	Total combined uncertainty	H-index
Bulk-rock MC-ICP-MS	SPD-1	5.75	0.14	0.12	0.857143
	SPD-2	8.31	0.25	0.18	0.72
	SPD-3	5.04	0.14	0.21	1.5
	SPD-4	12.27	0.15	0.26	1.73333
LA-MC-ICP-MS	SPD-1 L1	5.38	0.51	0.26	0.509804
	SPD-1 L2	5.74	0.54	0.59	1.09259
	SPD-1 L3	5.77	0.5	0.47	0.94
	SPD-1 L4	5.72	0.5	0.61	1.22
	SPD-2 L1	8.21	0.59	0.4	0.677966
	SPD-2 L2	8.35	0.62	0.6	0.967742
	SPD-2 L3	8.34	0.52	0.45	0.865385
	SPD-2 L4	8.35	0.5	0.52	1.04
	SPD-3 L1	5.04	0.54	0.55	1.01852
	SPD-3 L2	4.81	0.53	0.37	0.698113
	SPD-3 L3	5.08	0.52	0.62	1.19231
	SPD-3 L4	5.16	0.51	0.39	0.764706
	SPD-4 L1	14.43	0.57	0.5	0.877193
	SPD-4 L2	12.42	0.51	0.57	1.11765
	SPD-4 L3	12.26	0.49	0.52	1.06122
	SPD-4 L4	12.2	0.49	0.66	1.34694
